# Supplementary material for: Constructing and optimizing 3D atlases from 2D data with application to the developing mouse brain
Source: eLife journal article supplement (doi:10.7554/elife.61408), 2021-02-11
Supplement: supp [file elife-61408-supp-v1.zip]

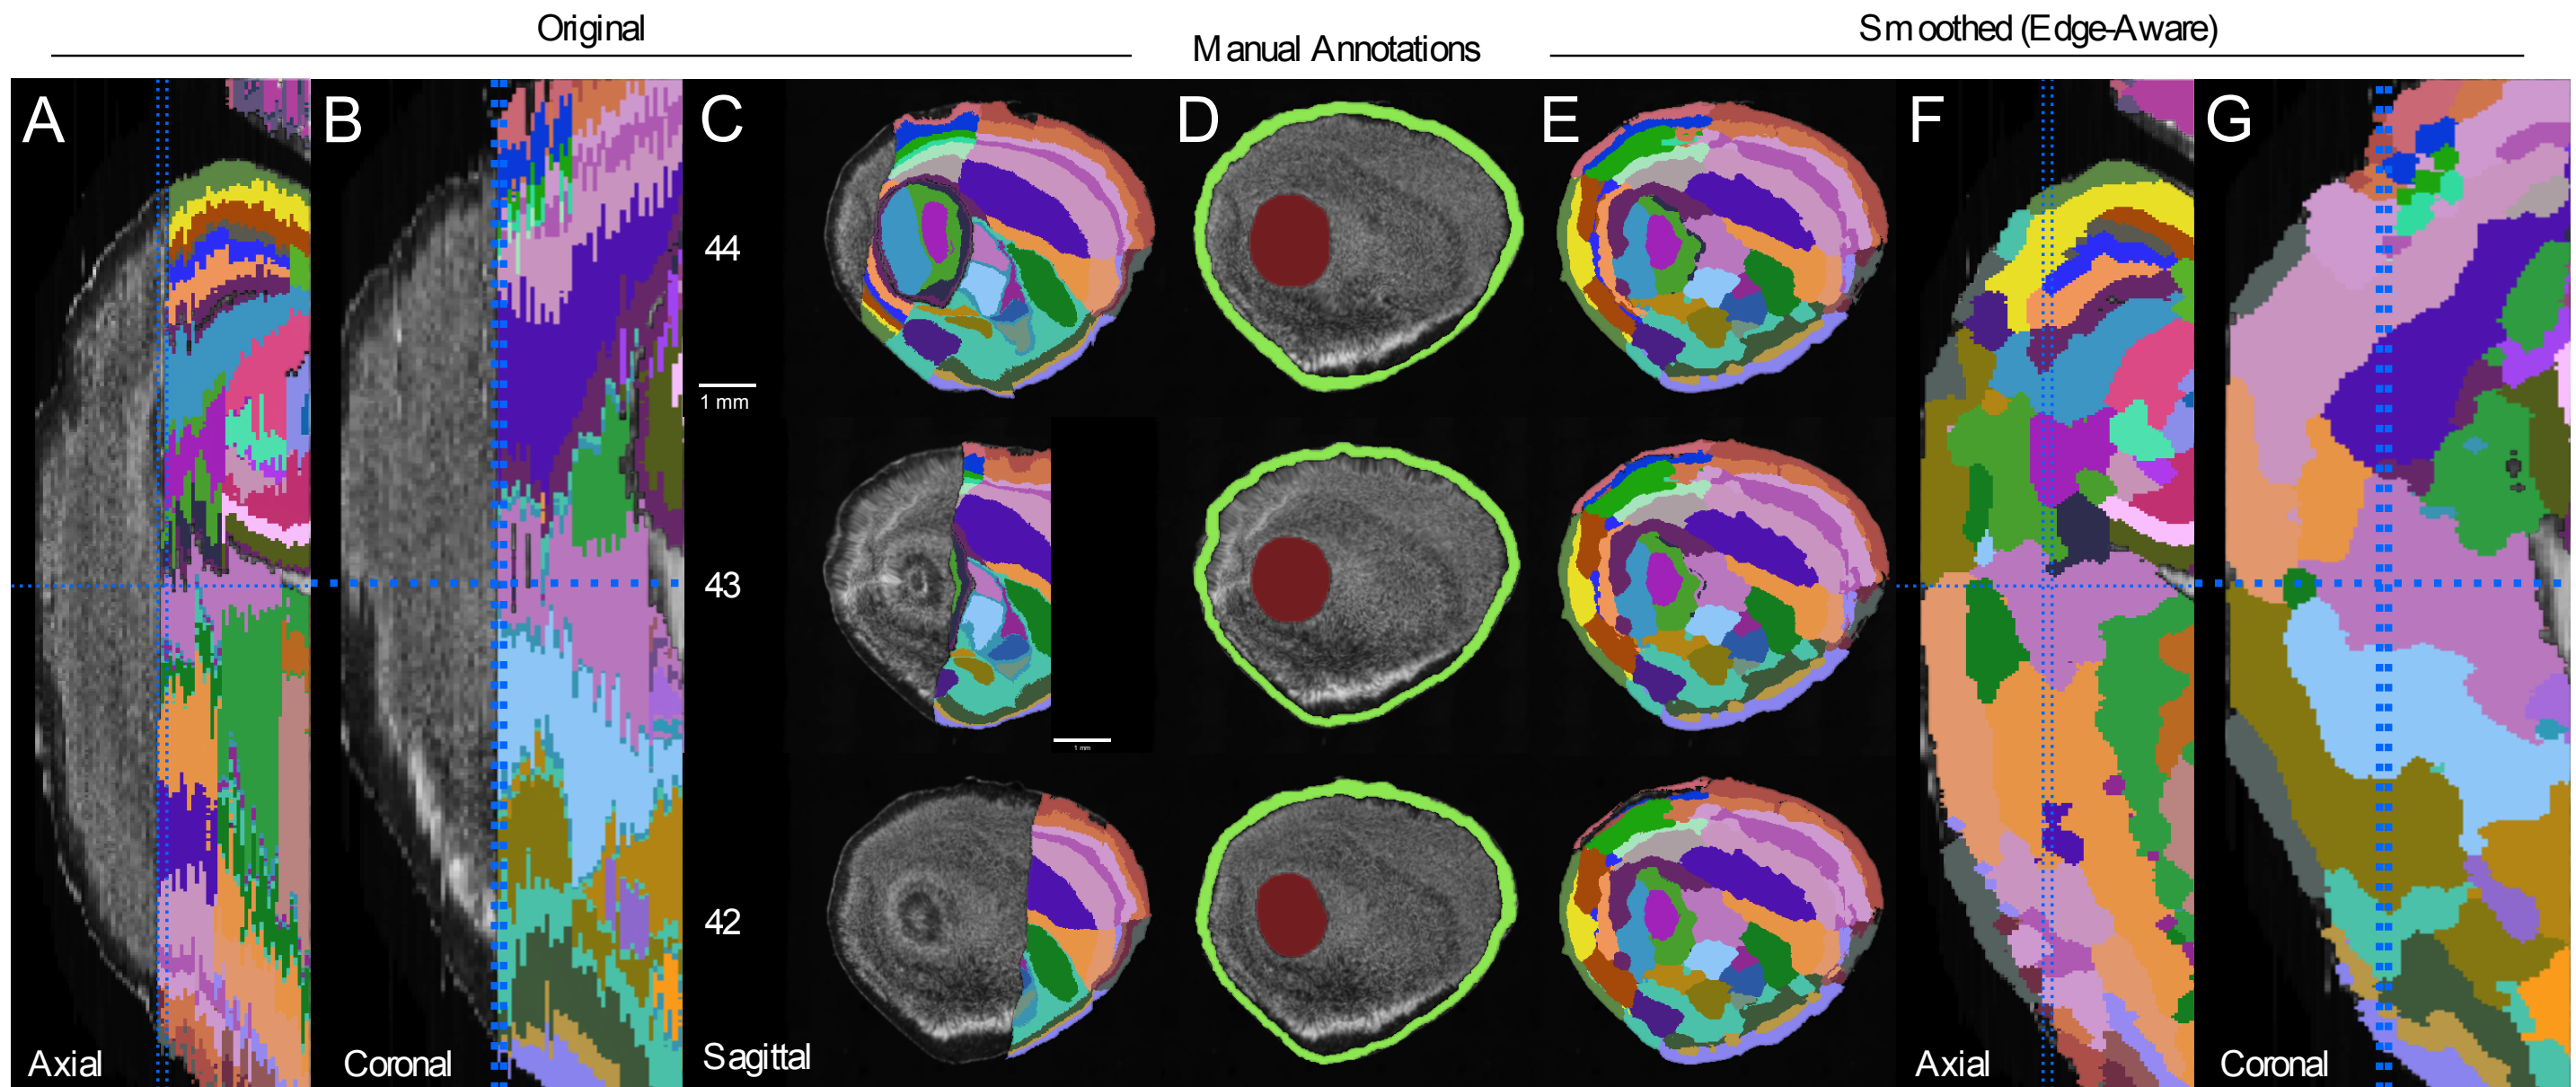

DSC (weighted average): 0.65  
Hippocampal DSC: 0.81  
Layer 1 DSC: 0.54

DSC (weighted average): 0.75  
Hippocampal DSC: 0.82  
Layer 1 DSC: 0.71

DSC (weighted average): 0.70  
Hippocampal DSC: 0.79  
Layer 1 DSC: 0.63
