# Supplementary material for: Constructing and optimizing 3D atlases from 2D data with application to the developing mouse brain
Source: eLife journal article supplement (doi:10.7554/elife.61408), 2021-02-11

A

## Ventromedial Hypothalamus (VMH)

Sagittal

Axial

Coronal

Microscopy

Original Labels

Eroded Labels with  
Anatomical MapSmoothed Labels  
(Edge-Aware)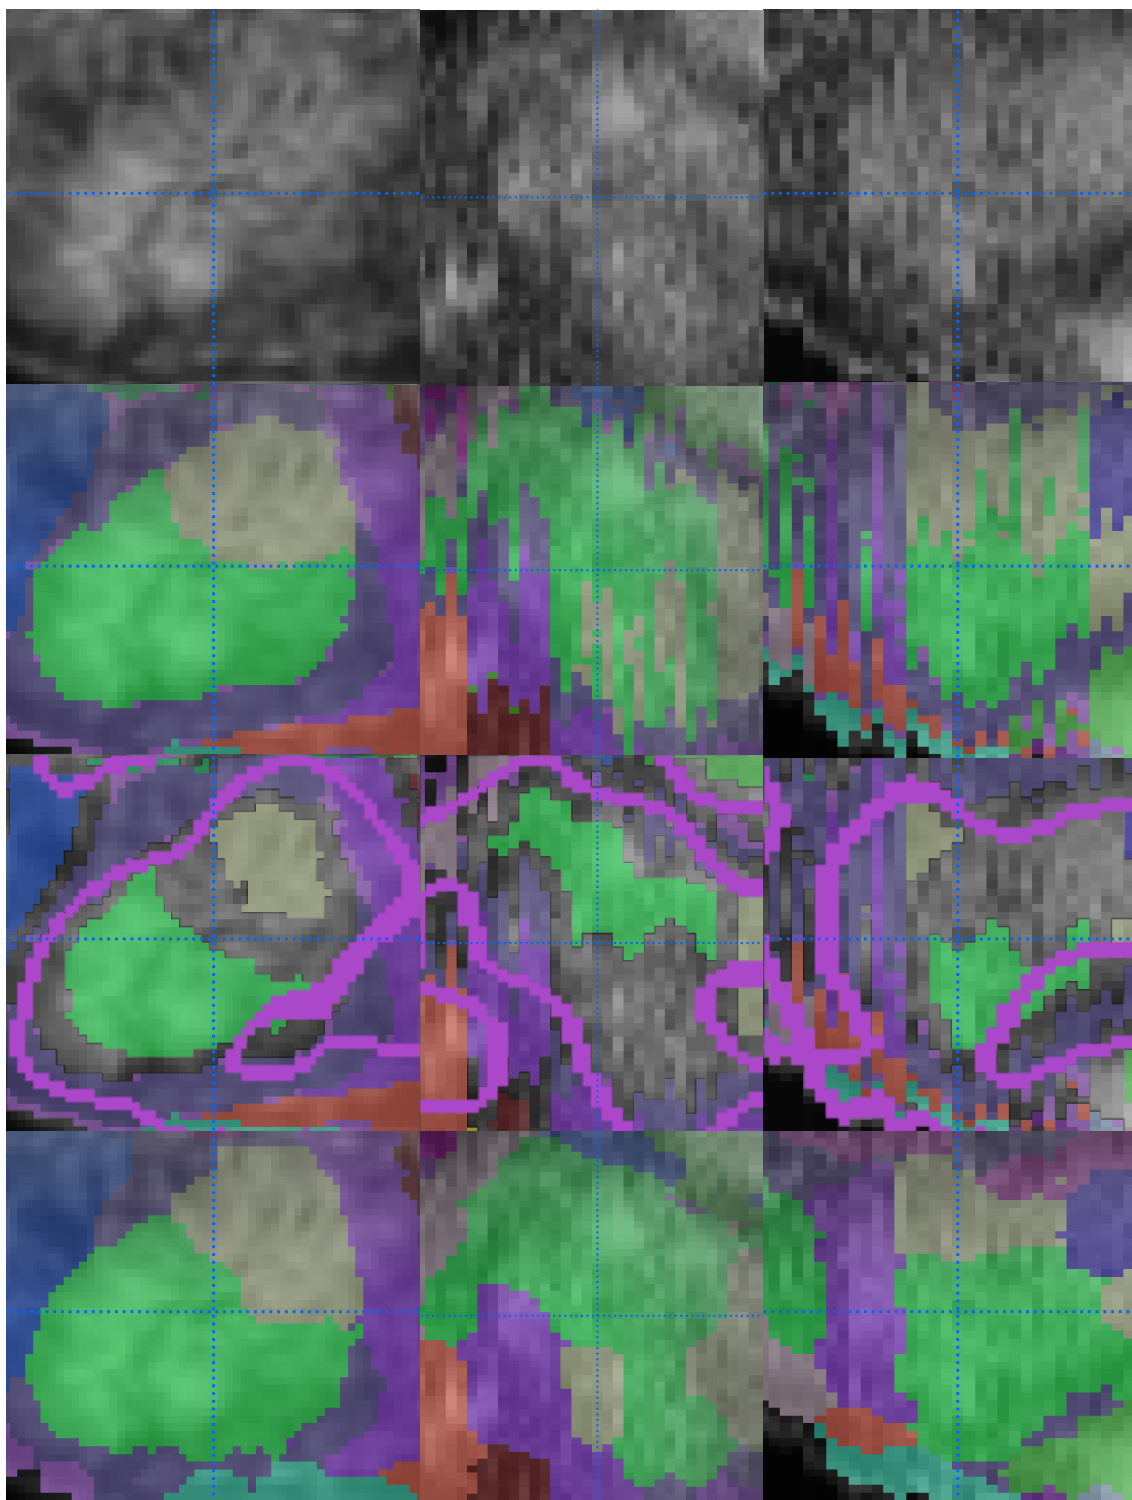

B

## Pontine Hindbrain

Sagittal

Axial

Coronal

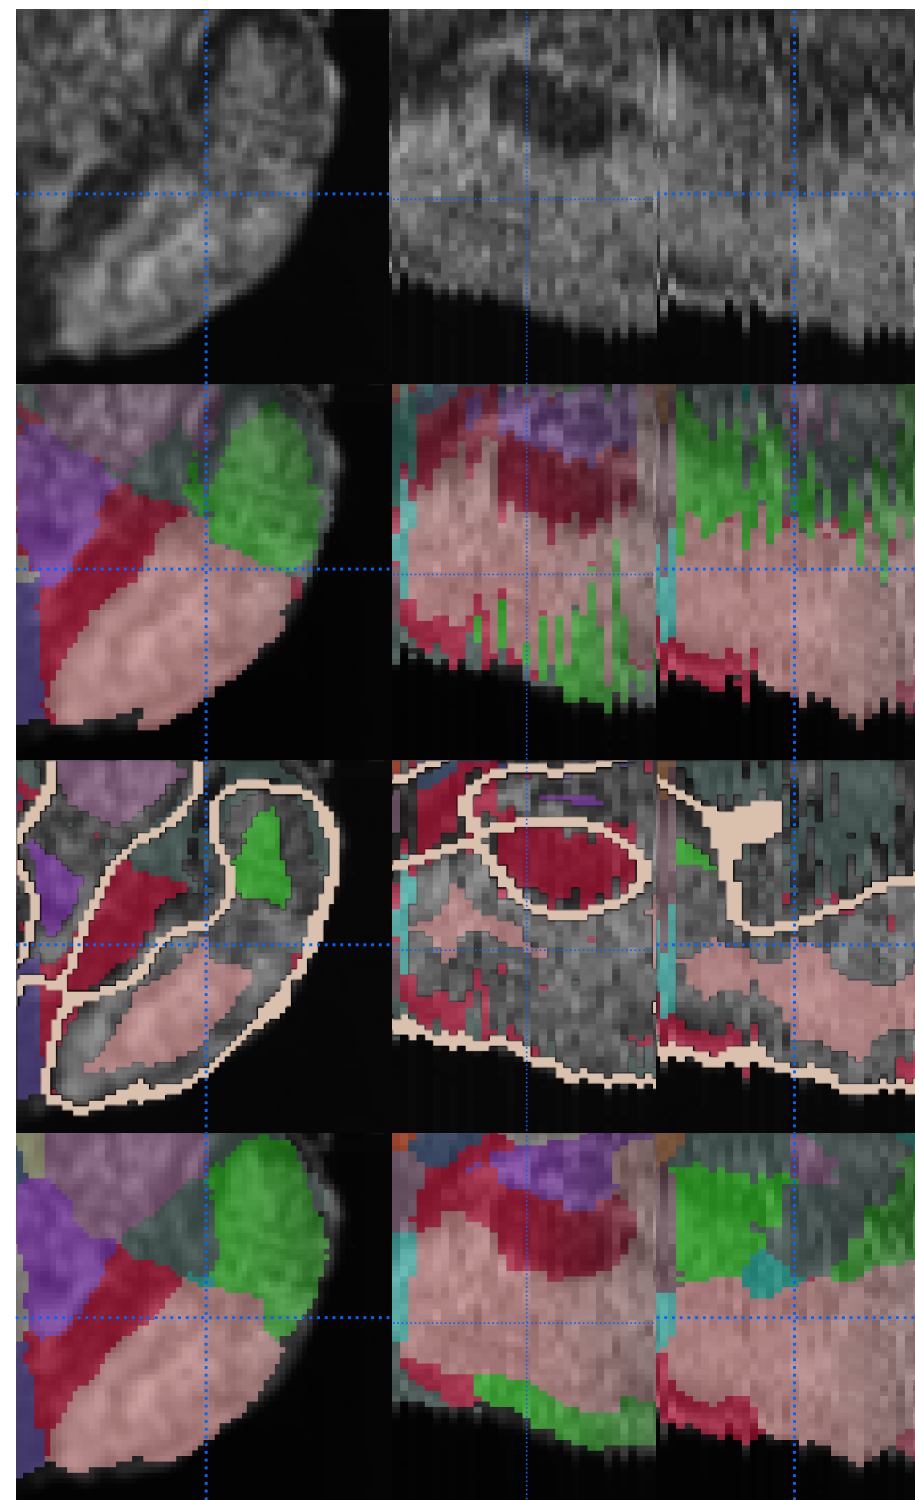

Supplement: supp [file elife-61408-supp-v1.zip]
