# Supplementary material for: Constructing and optimizing 3D atlases from 2D data with application to the developing mouse brain
Source: eLife journal article supplement (doi:10.7554/elife.61408), 2021-02-11

A

Unregistered Mirrored Atlas on Original and Contralateral Hemispheres

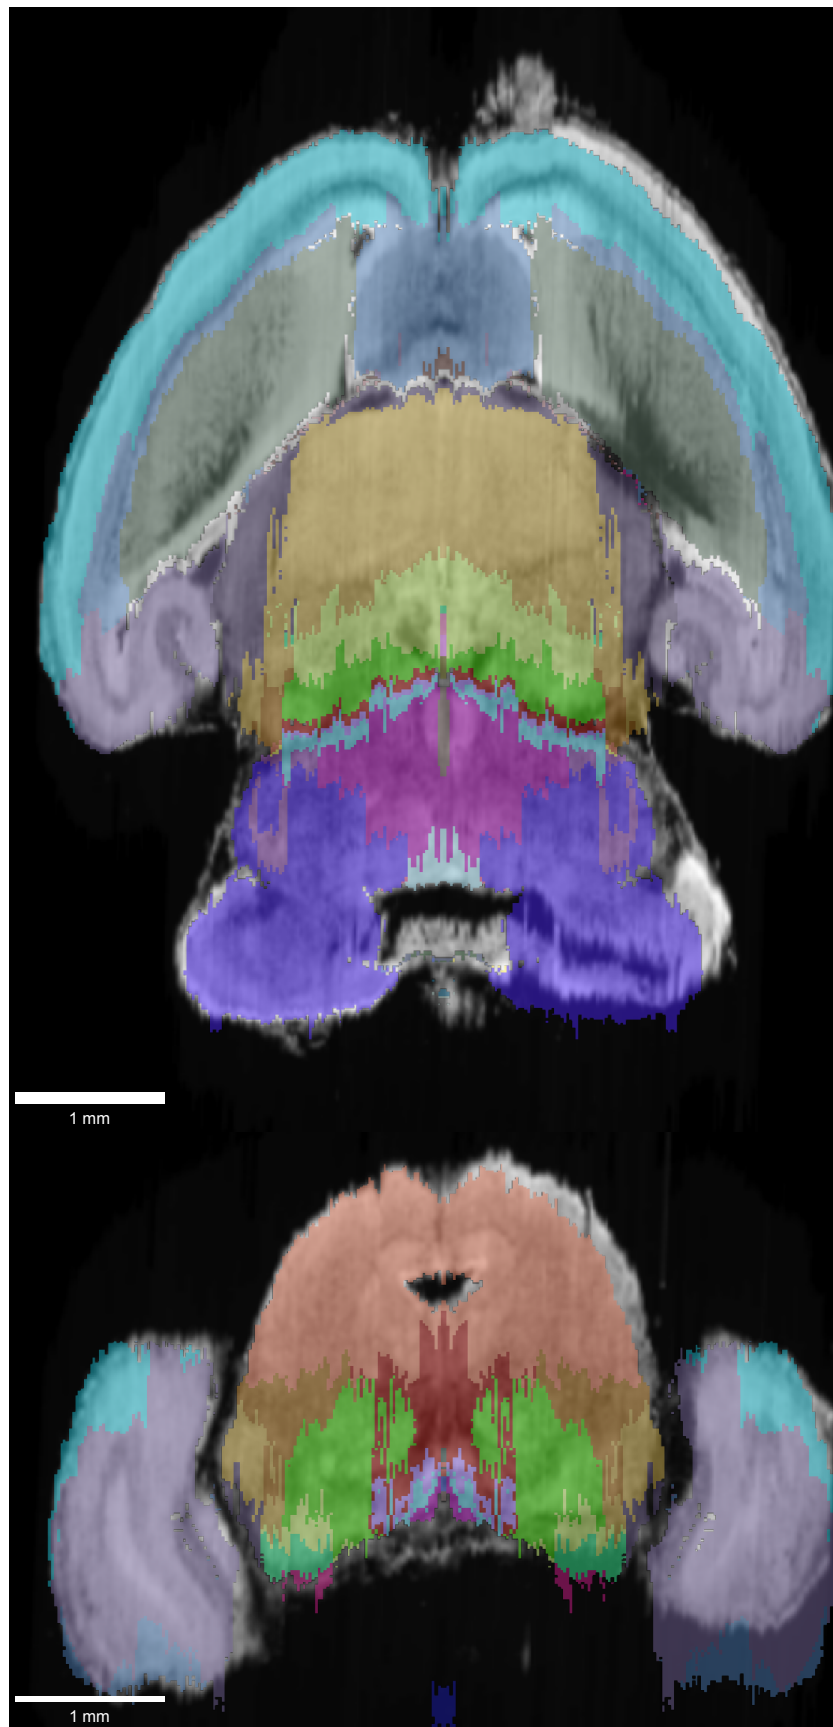

B

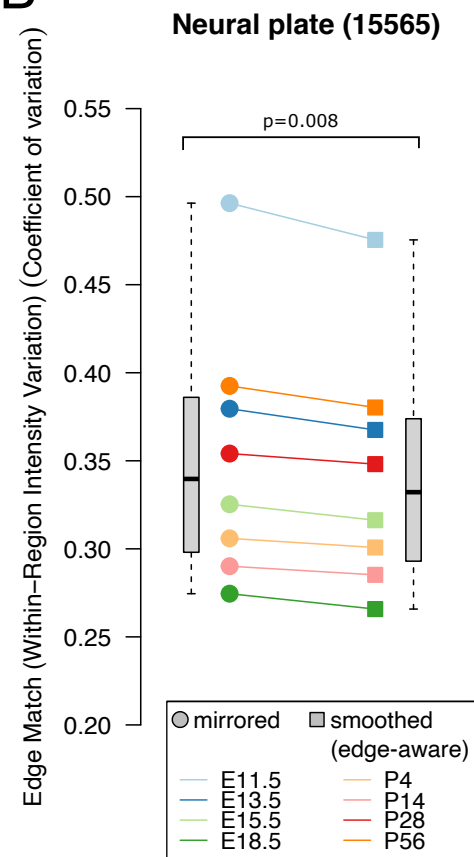

C

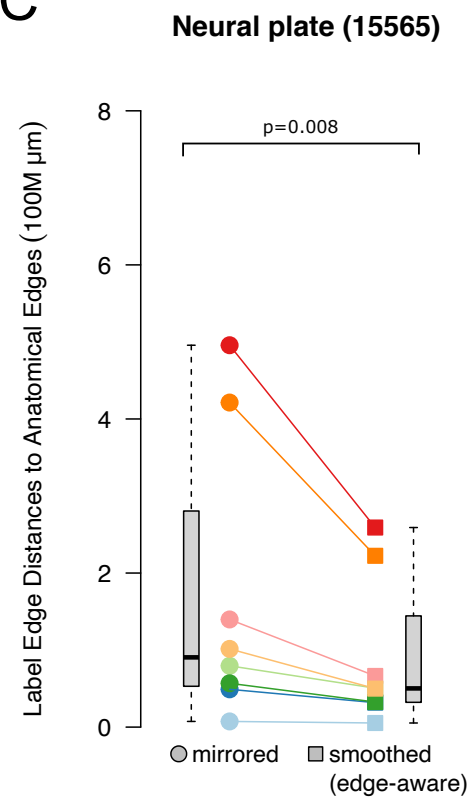

Original Hemisphere (Left)

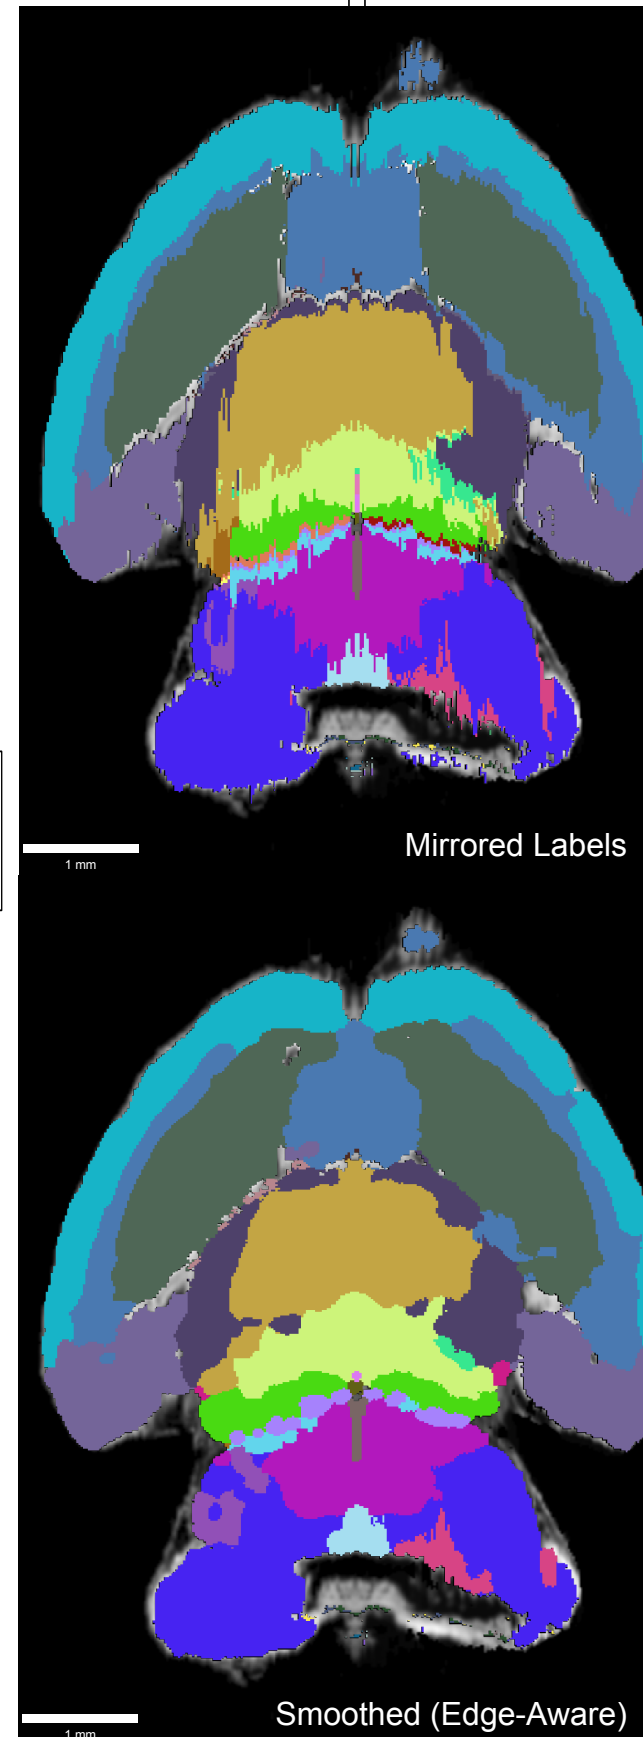

Contralateral Hemisphere (Right)

D

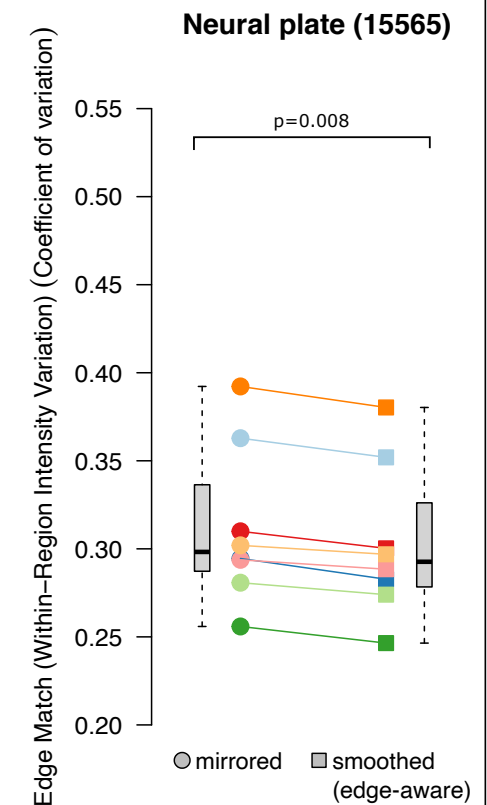

E

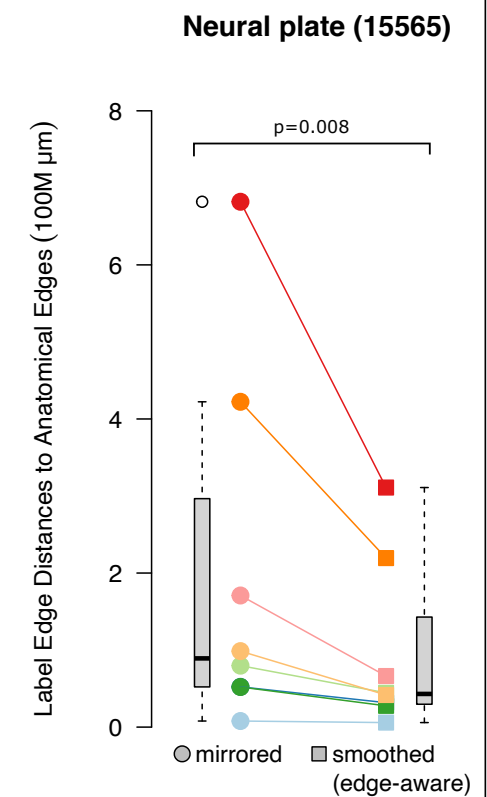

Supplement: supp [file elife-61408-supp-v1.zip]
