# Supplementary figures and images for: Constructing and optimizing 3D atlases from 2D data with application to the developing mouse brain
Source: eLife journal article supplement (doi:10.7554/elife.61408), 2021-02-11

**A**

Lateral unlabeled planes

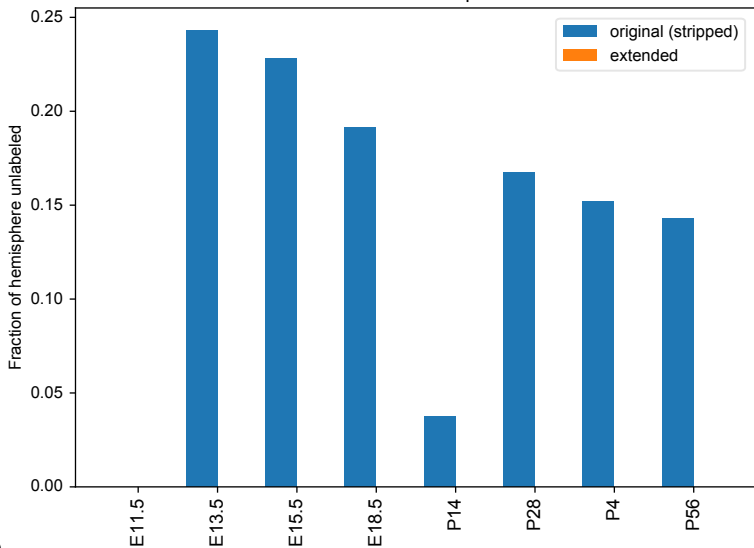**B**

Lateral unlabeled volume

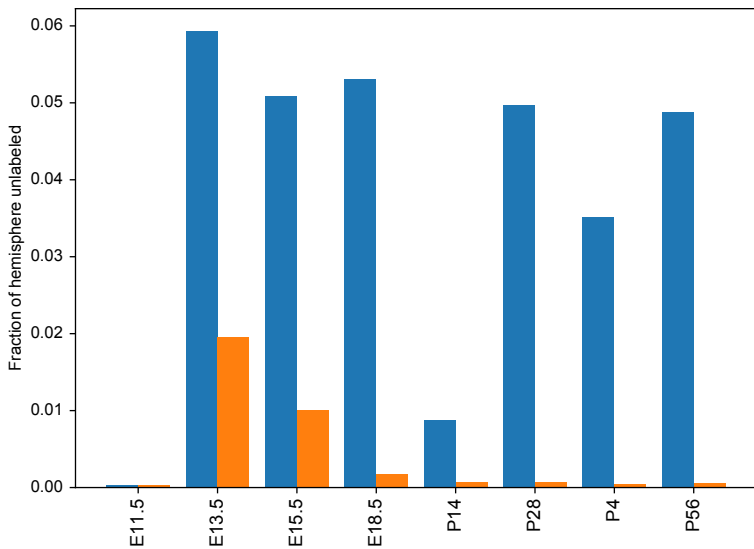

Supplement: supp [file elife-61408-supp-v1.zip]

Label to Anatomical Edge Distances By Region

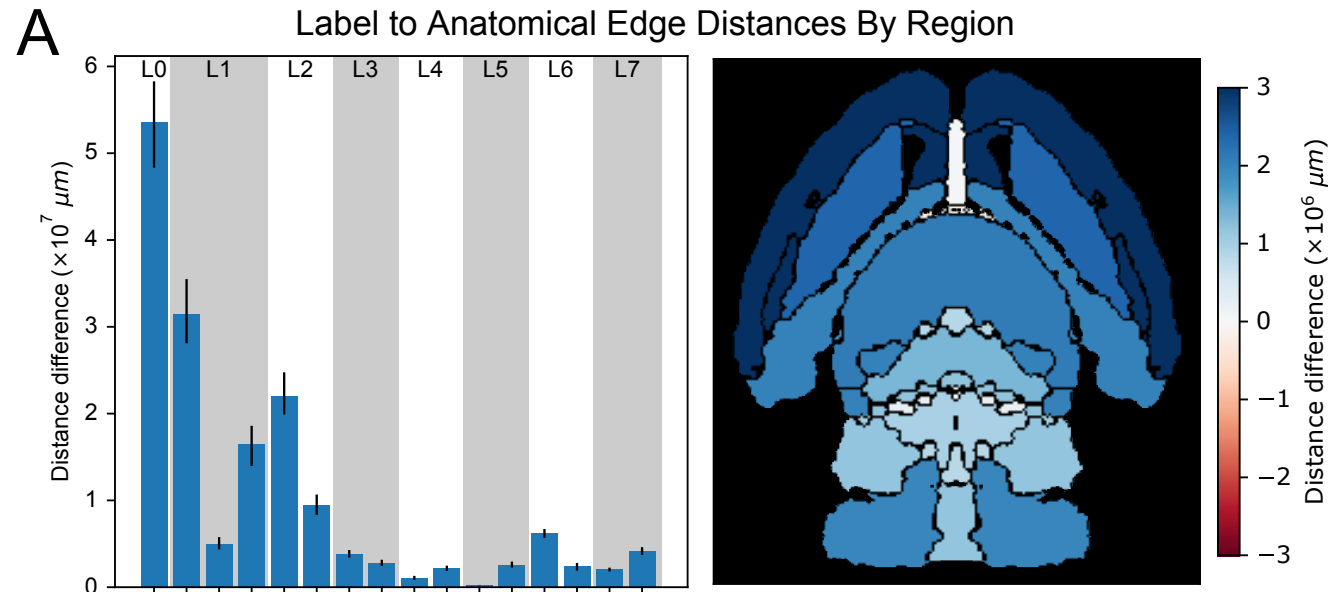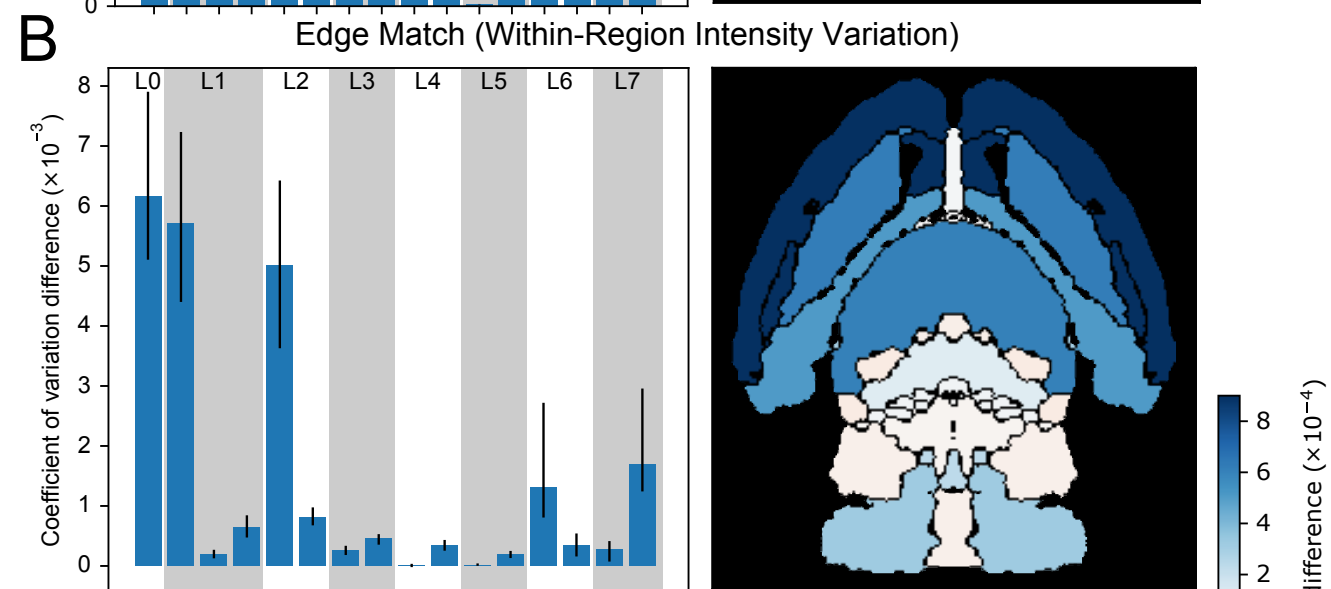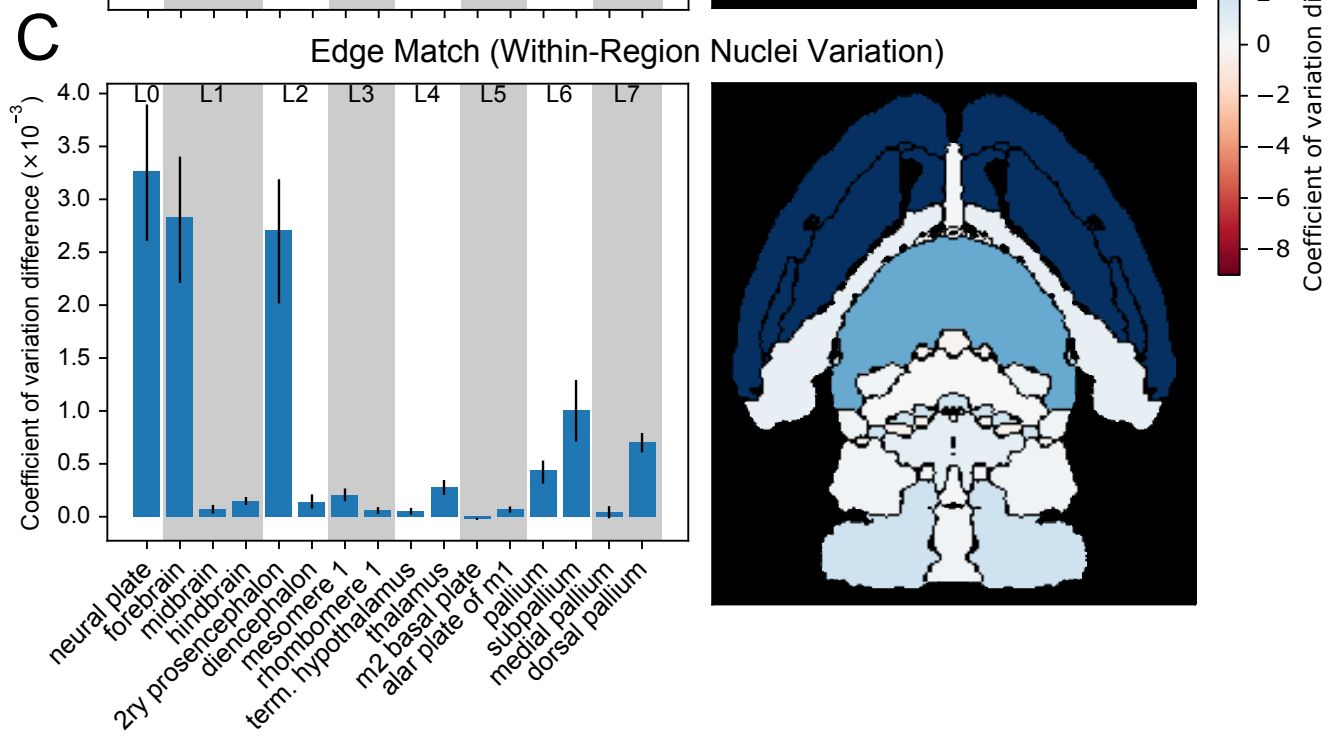

Supplement: supp [file elife-61408-supp-v1.zip]

No Smoothing

Smoothed

No Edge Awareness

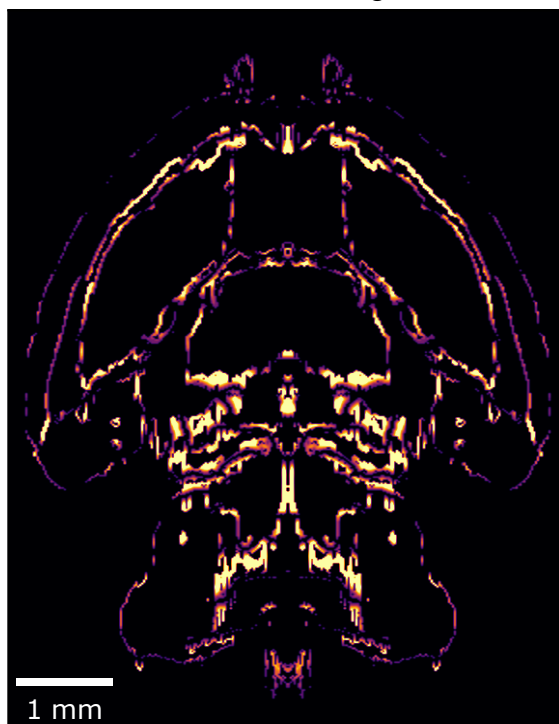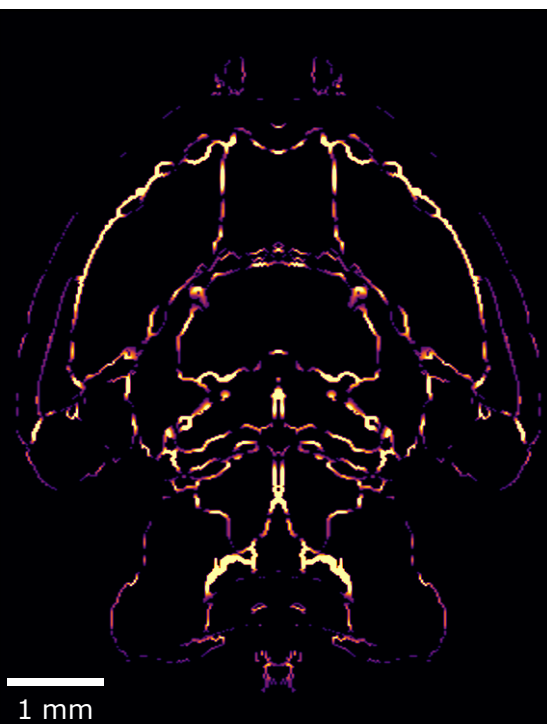

Edge Aware

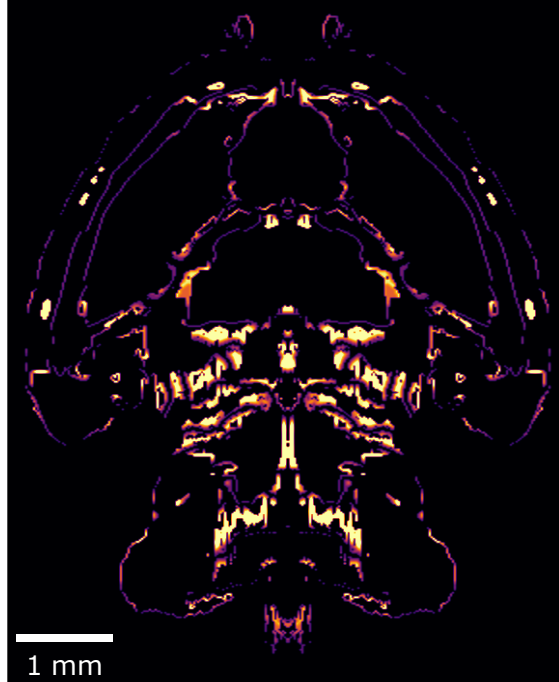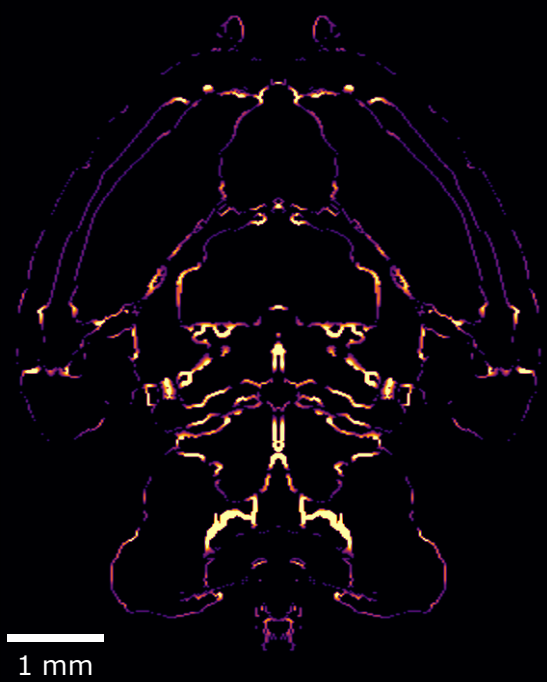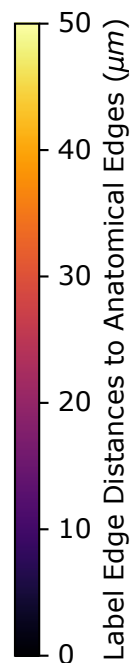

Supplement: supp [file elife-61408-supp-v1.zip]

# Whole Brain Histology and Labels Compactness

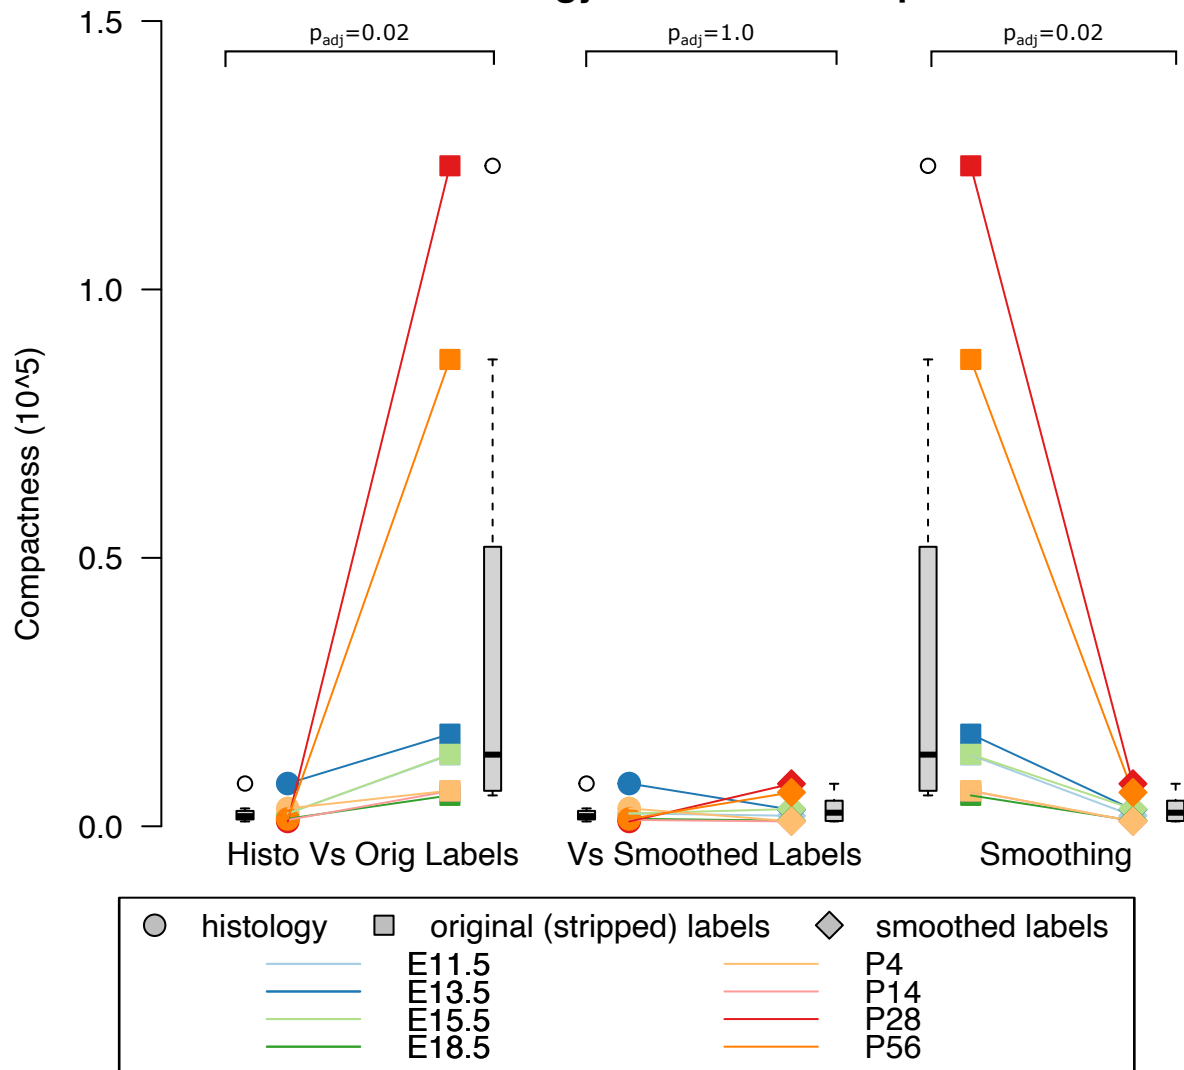

Supplement: supp [file elife-61408-supp-v1.zip]

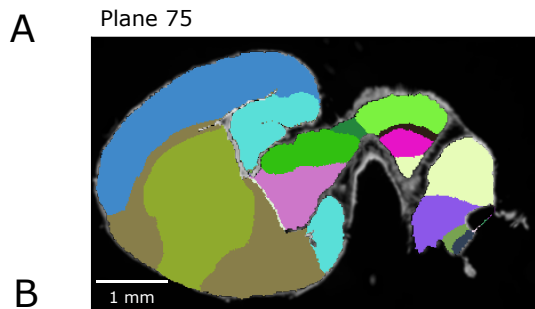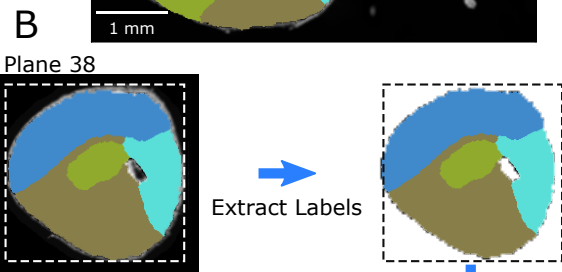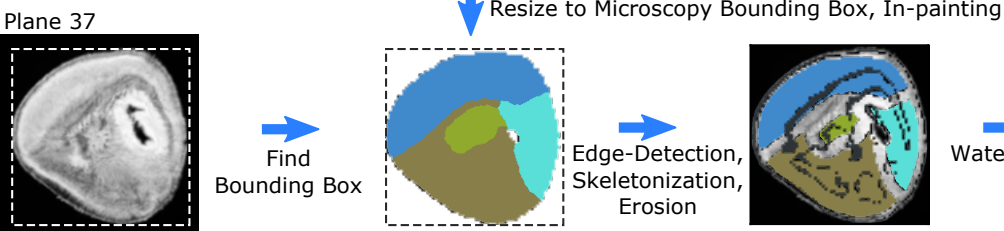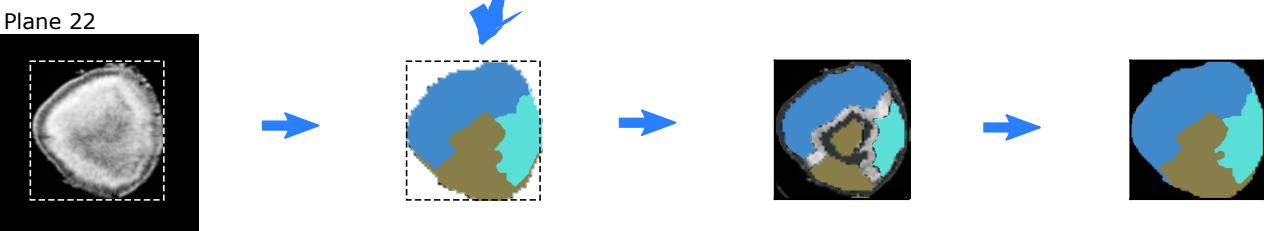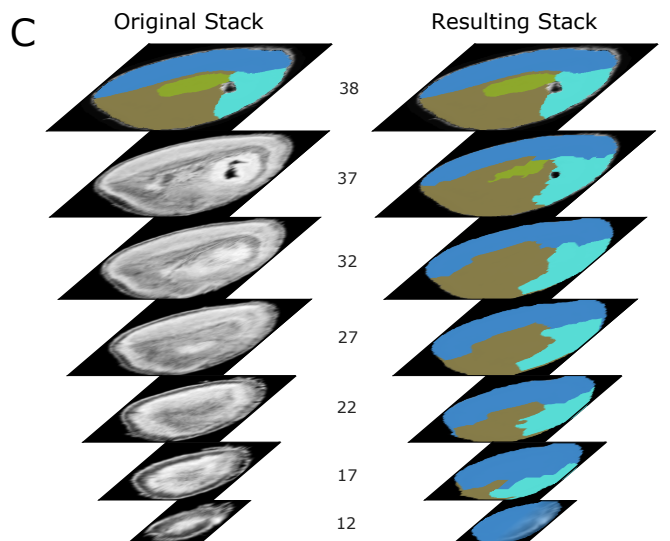

Supplement: supp [file elife-61408-supp-v1.zip]

Volume Changes by Label Volume

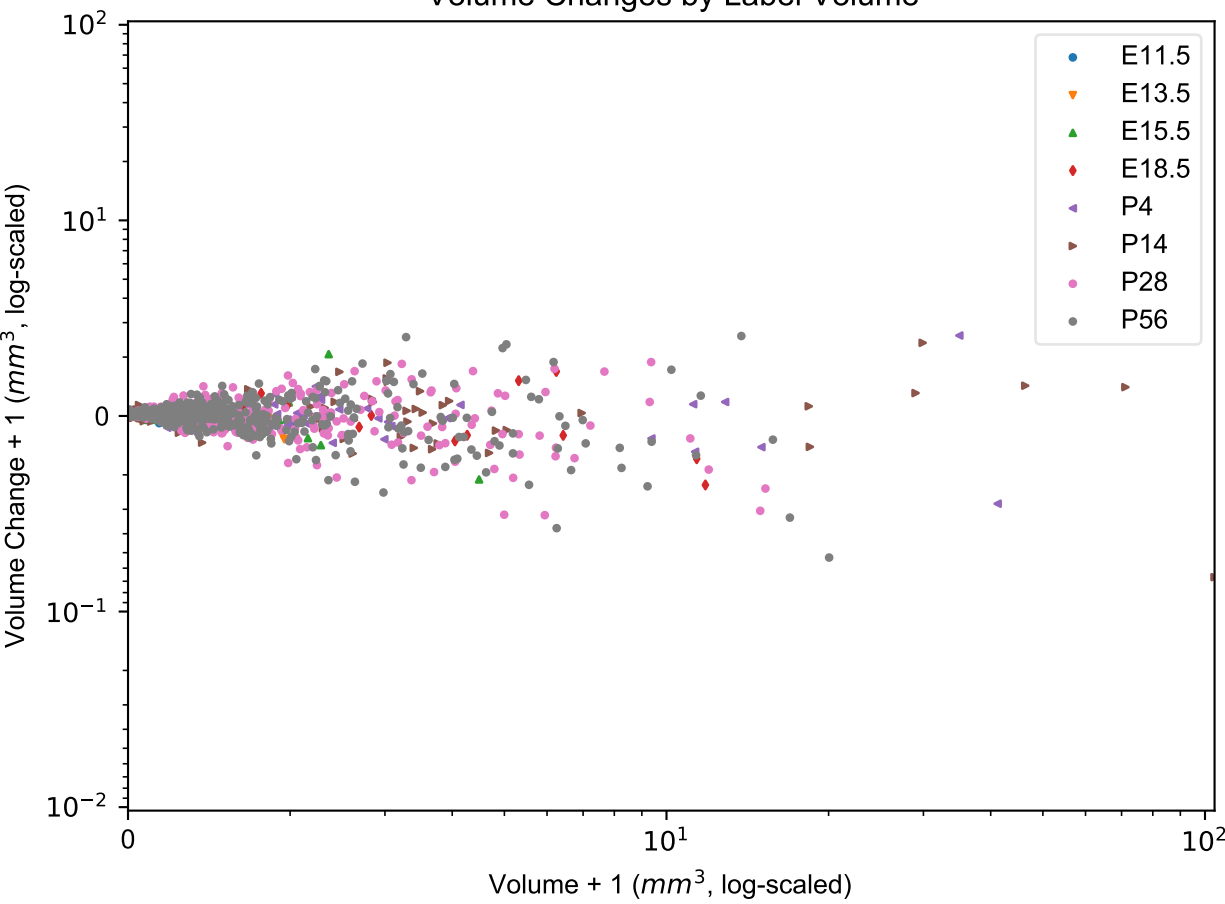

Supplement: supp [file elife-61408-supp-v1.zip]

A

E18.5 Sagittal Plane 103

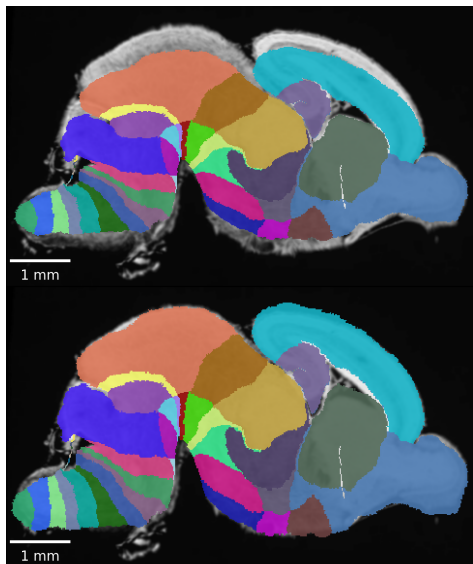

B

Original Stack

Resulting Stack

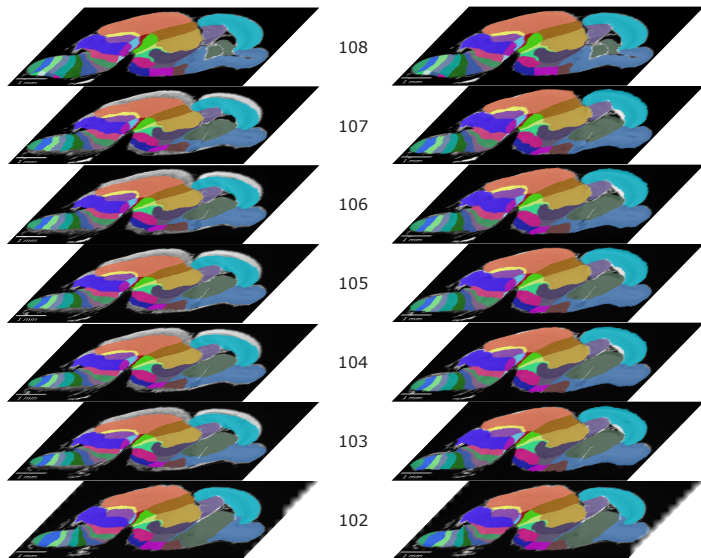

Supplement: supp [file elife-61408-supp-v1.zip]

A

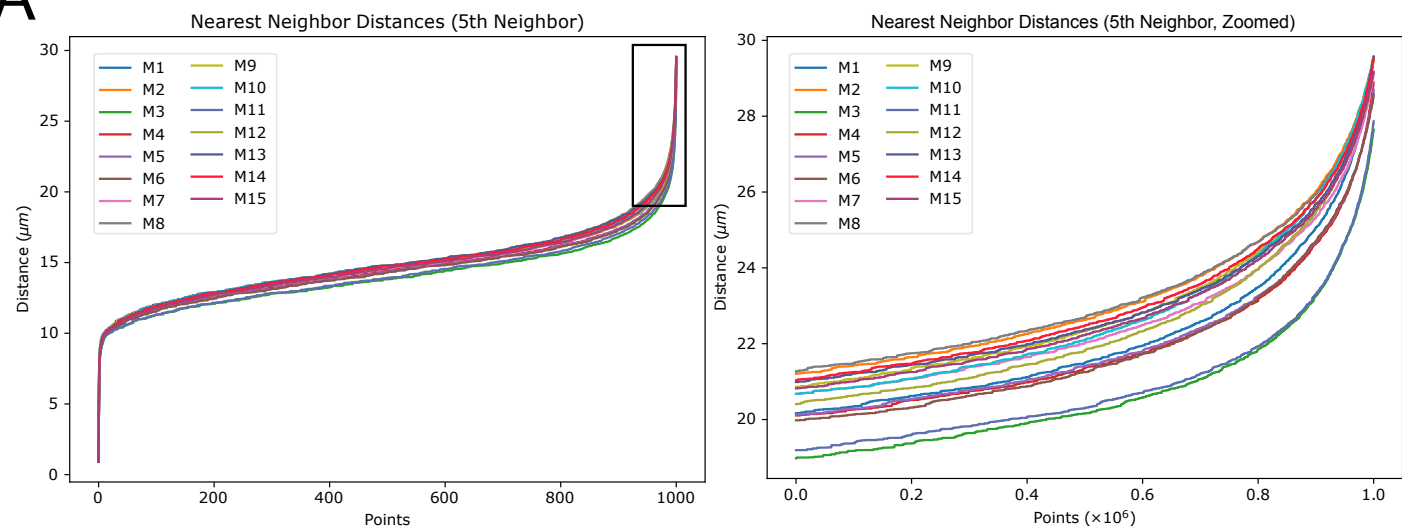

B

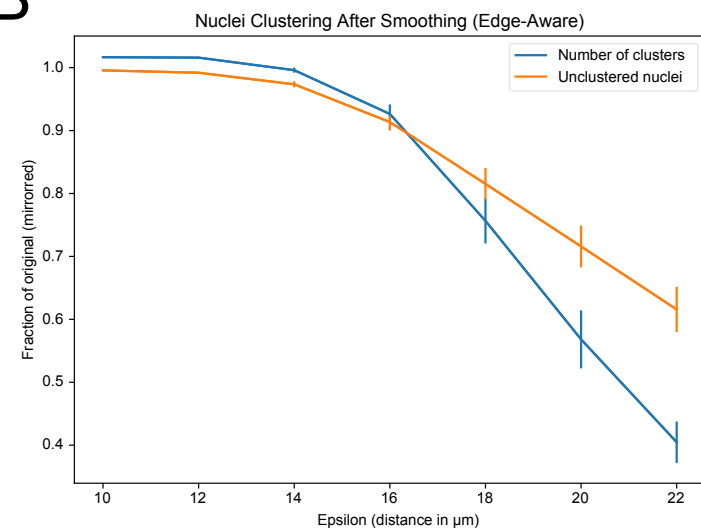

C

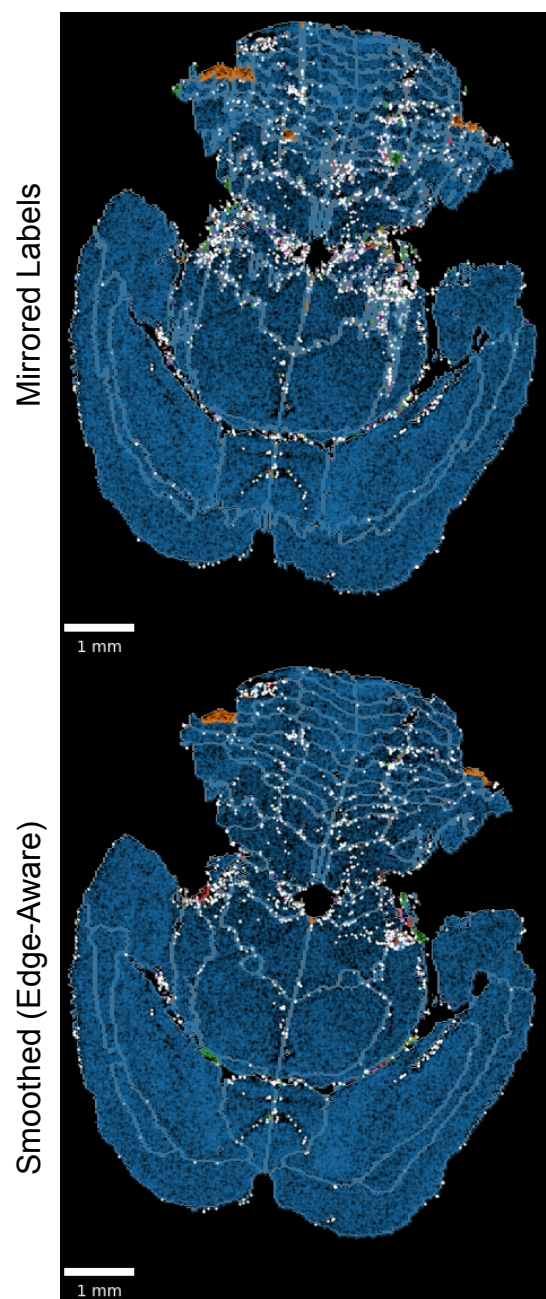

D

## Nuclei Isolation (Unclustered Nuclei)

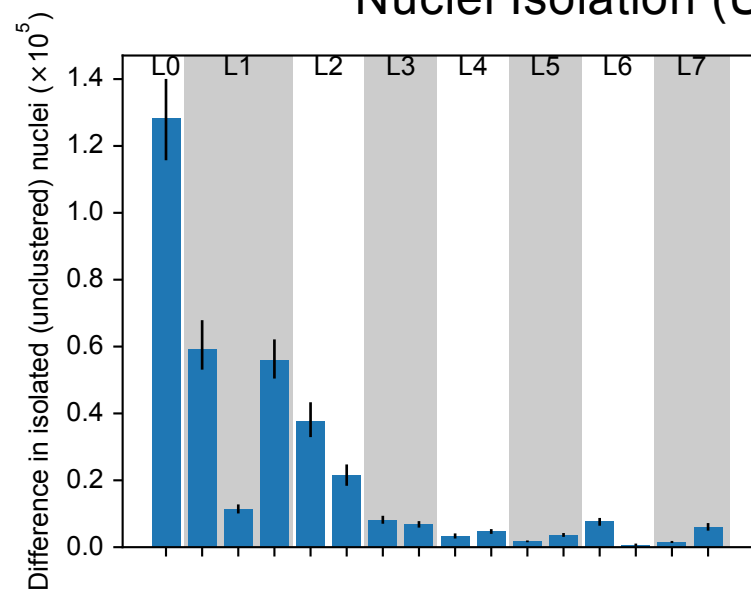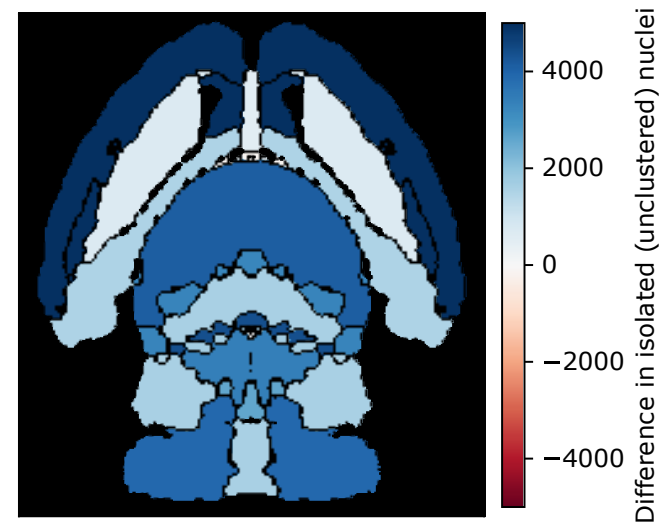

E

## Nuclei Cluster Fragmentation (Number of Clusters)

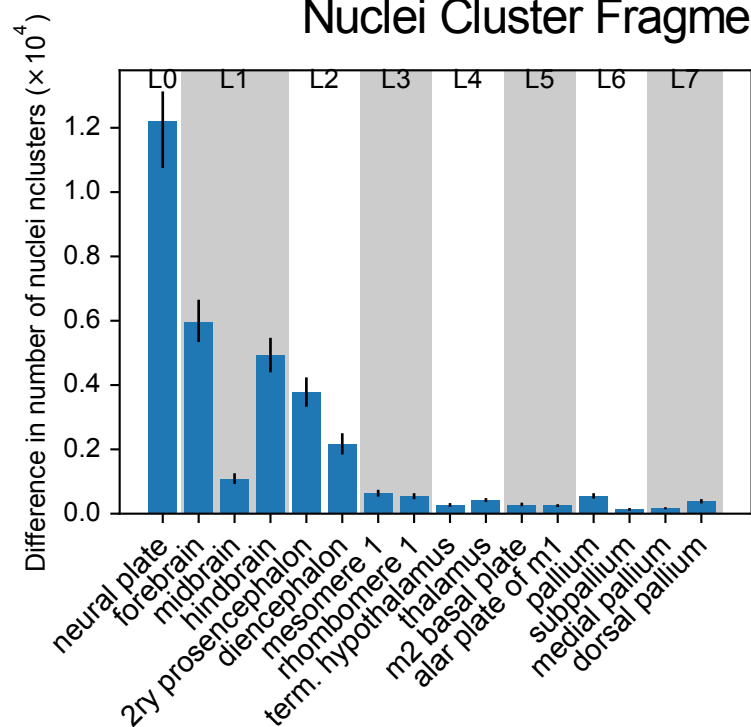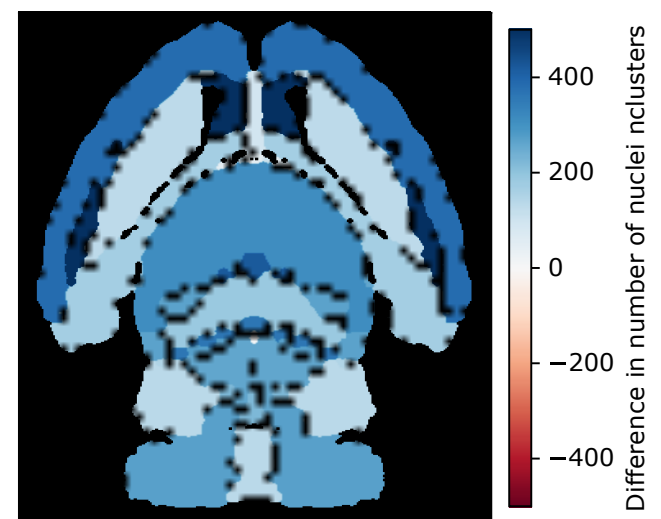

Supplement: supp [file elife-61408-supp-v1.zip]

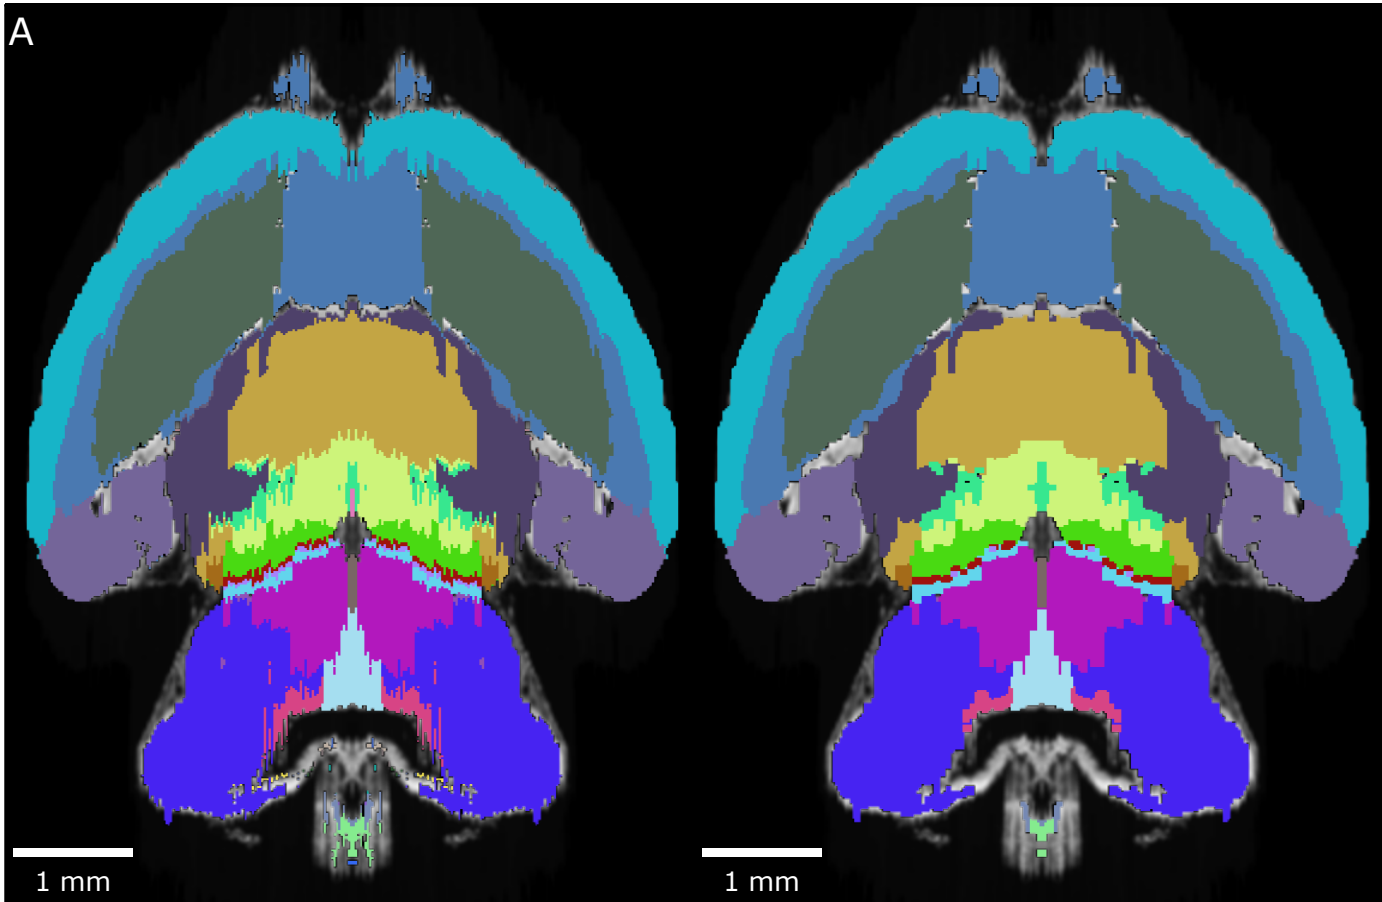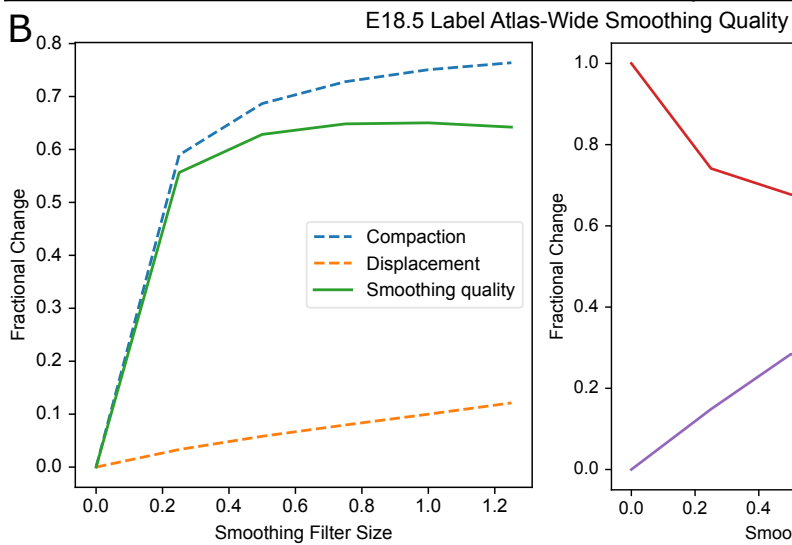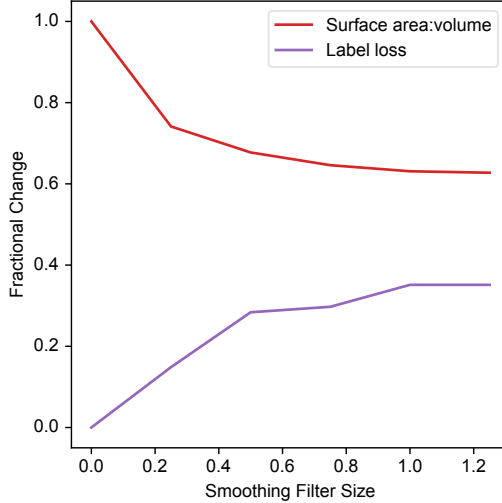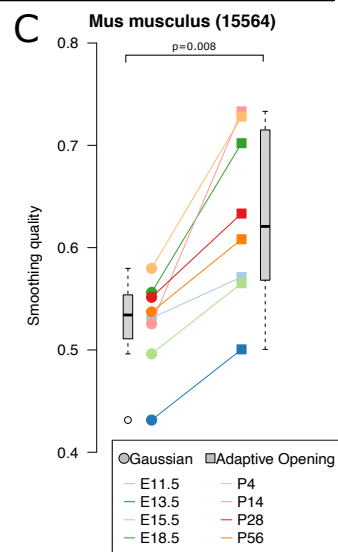

Supplement: supp [file elife-61408-supp-v1.zip]

**A** Volume Per Label

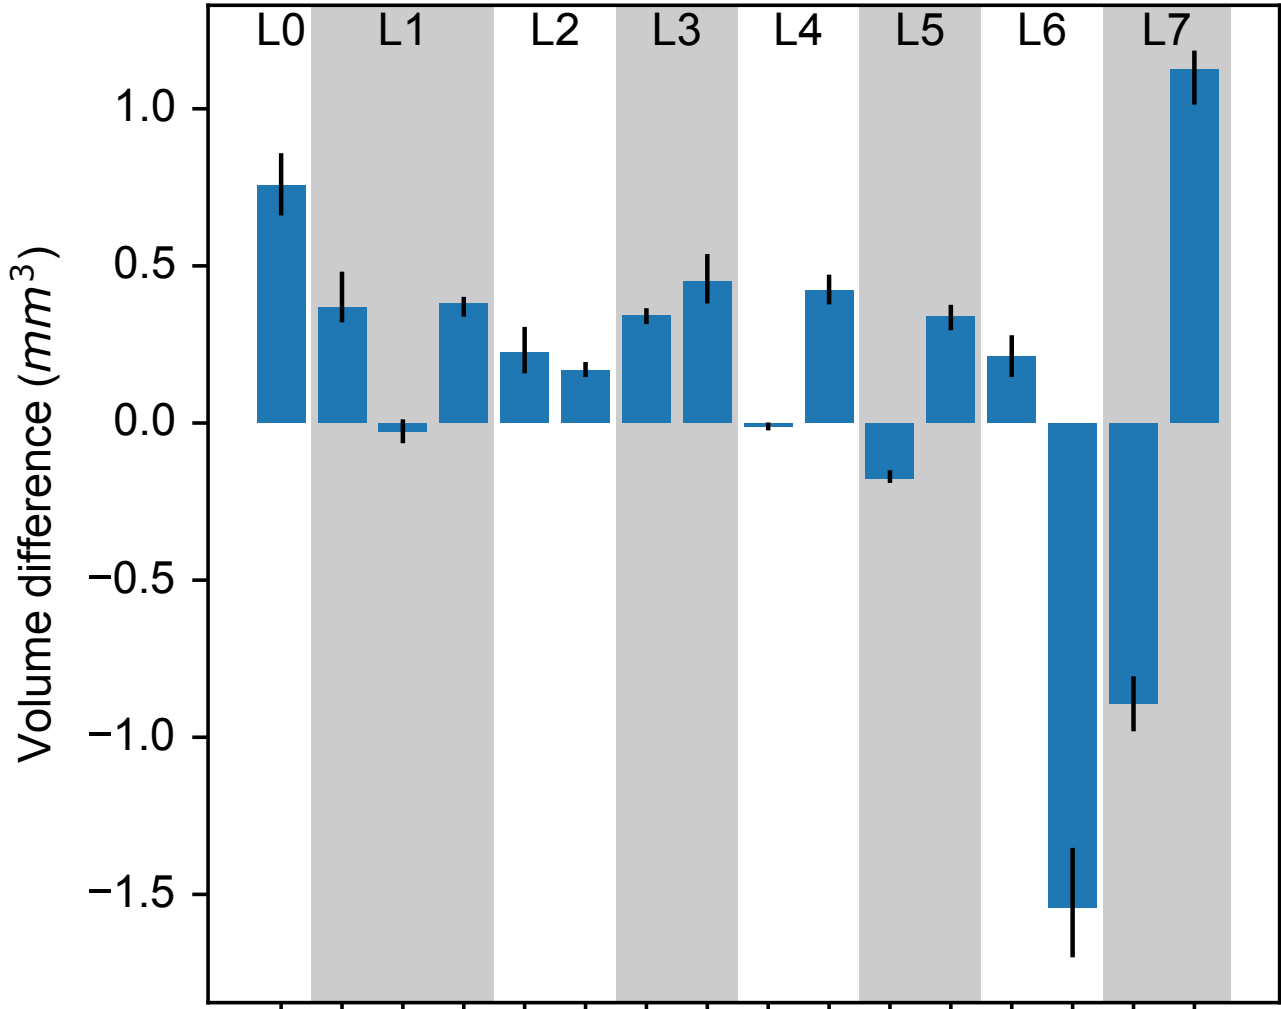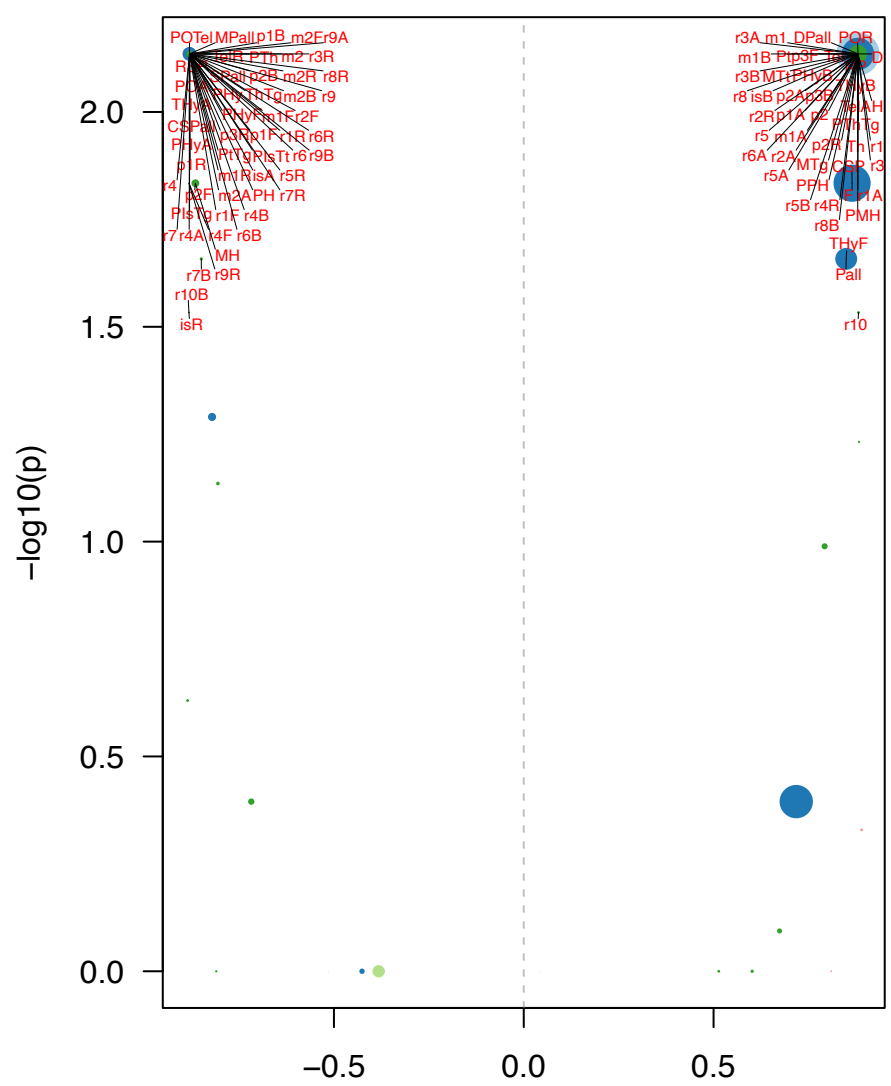

**B** Nuclei Per Label

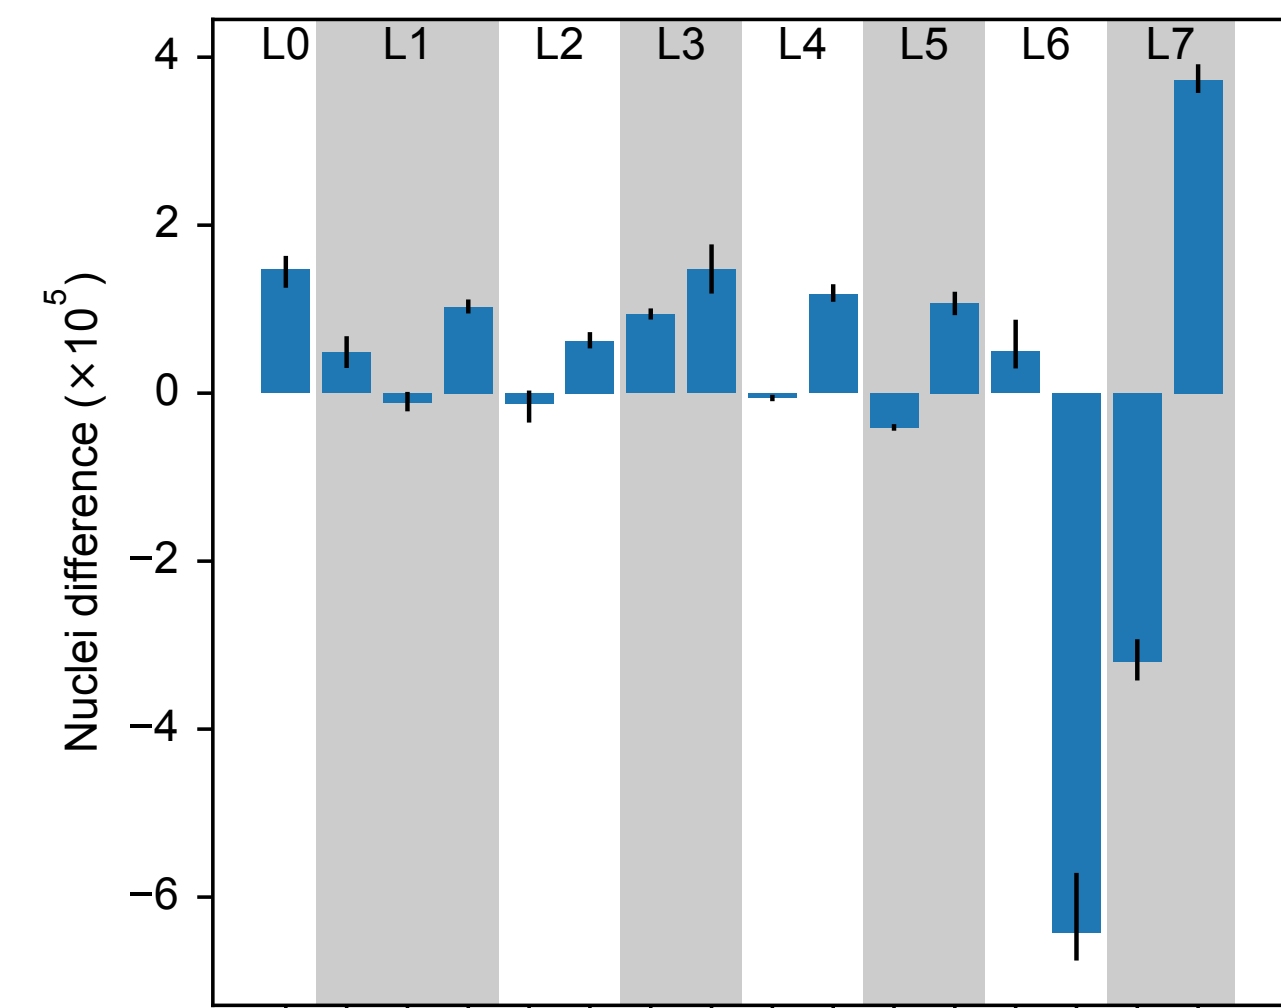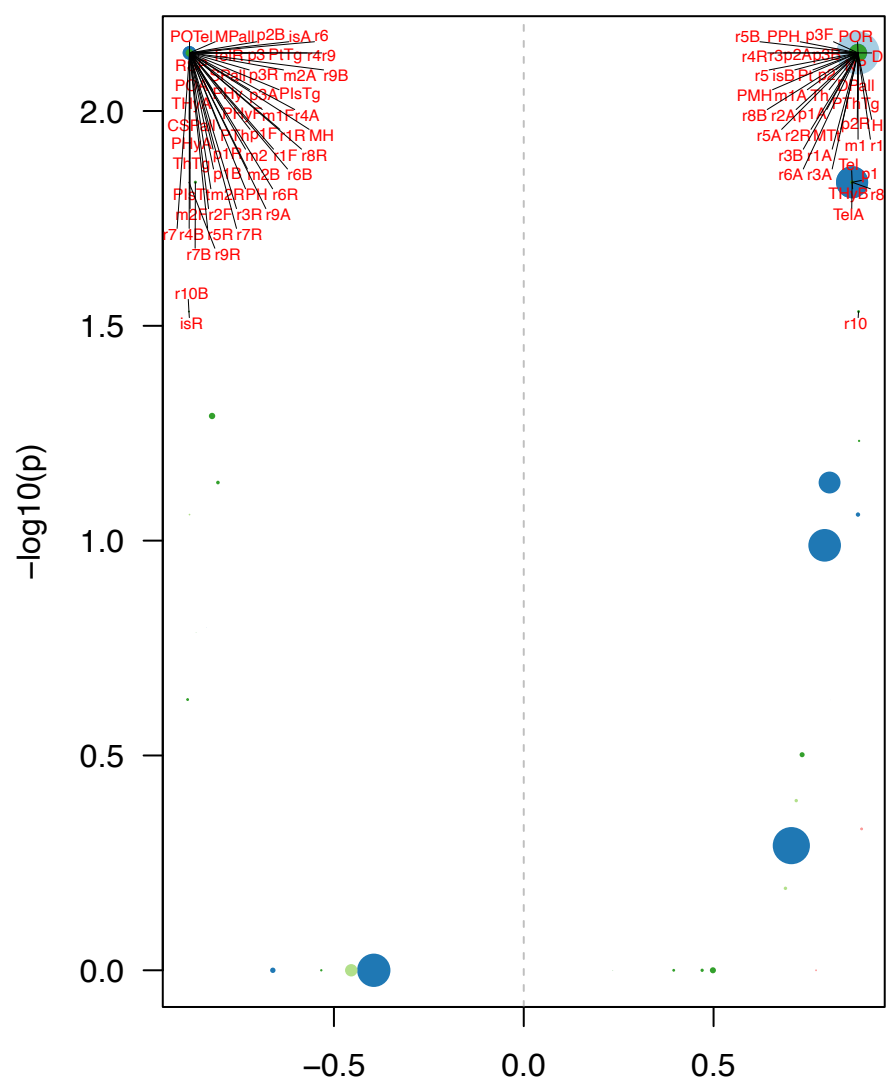

**C** Nuclei Density Per Label

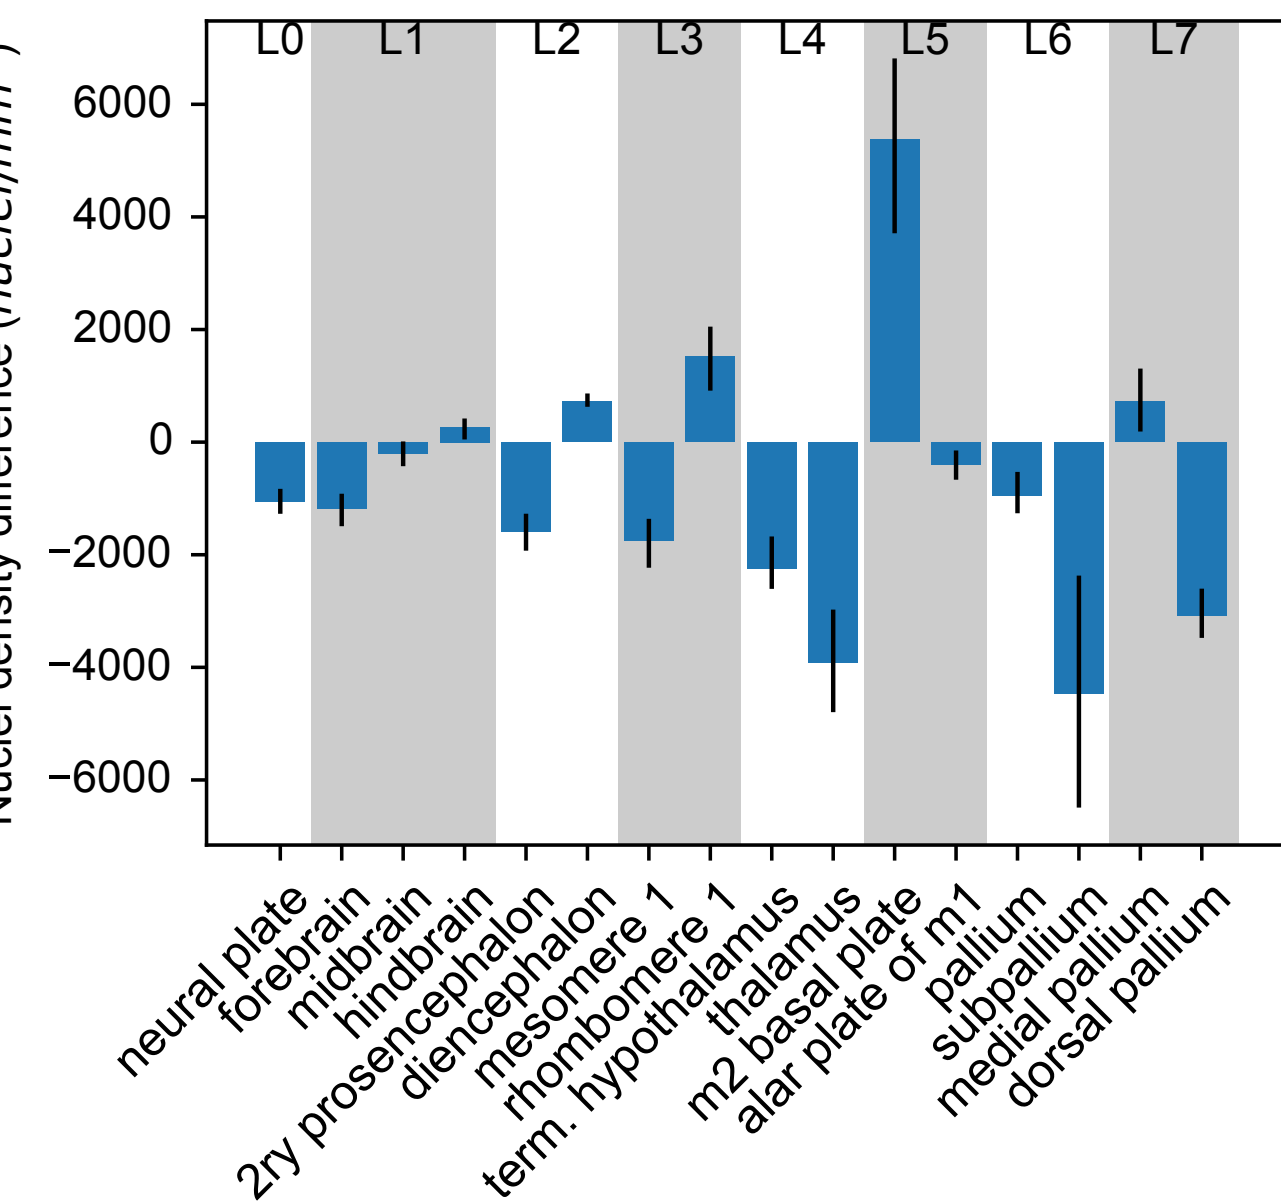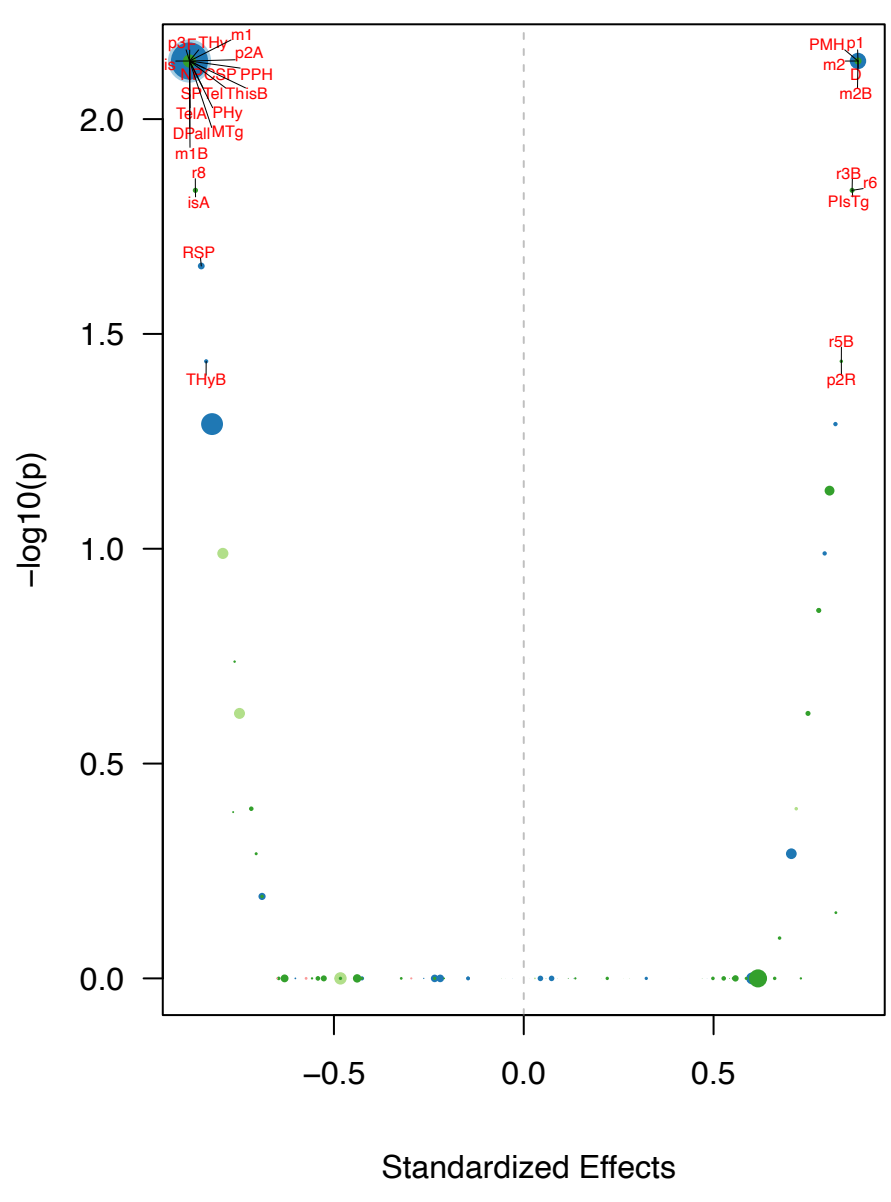

Standardized Effects

Supplement: supp [file elife-61408-supp-v1.zip]

Original

Affine 1

Affine 2

Affine 3

Axial view

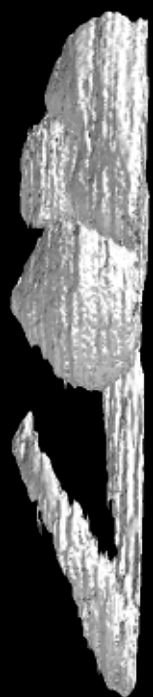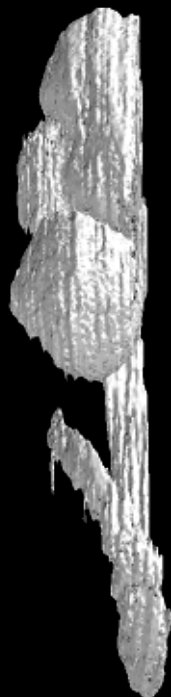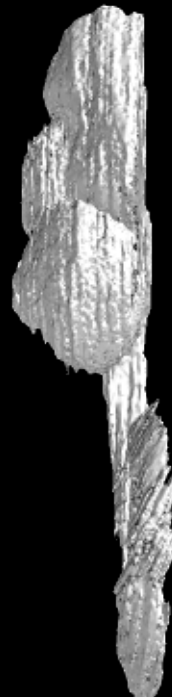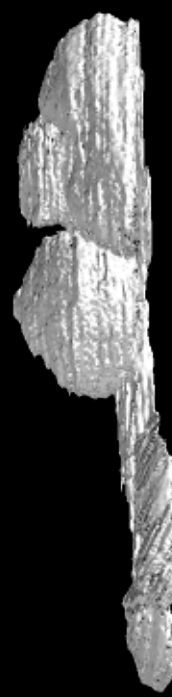

Oblique view

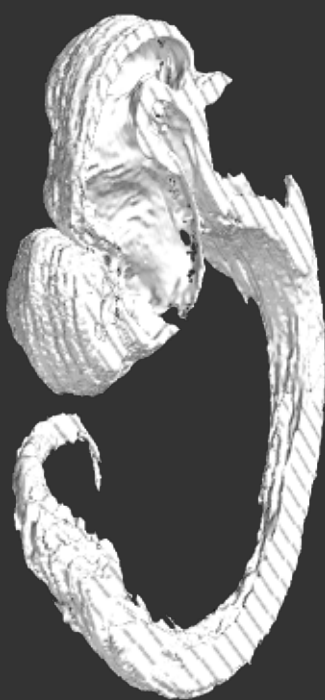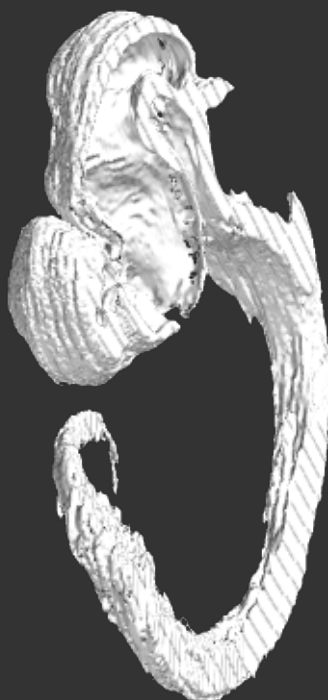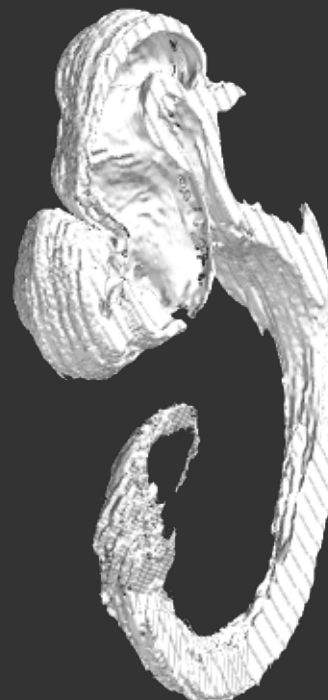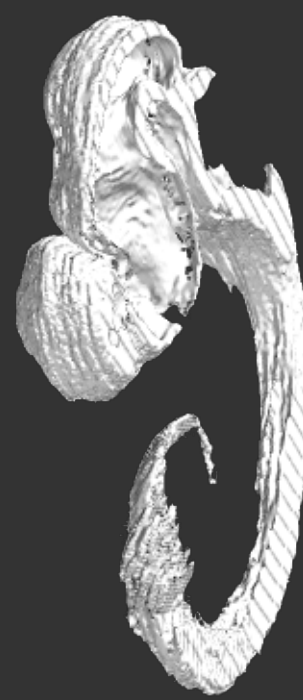

After Mirroring

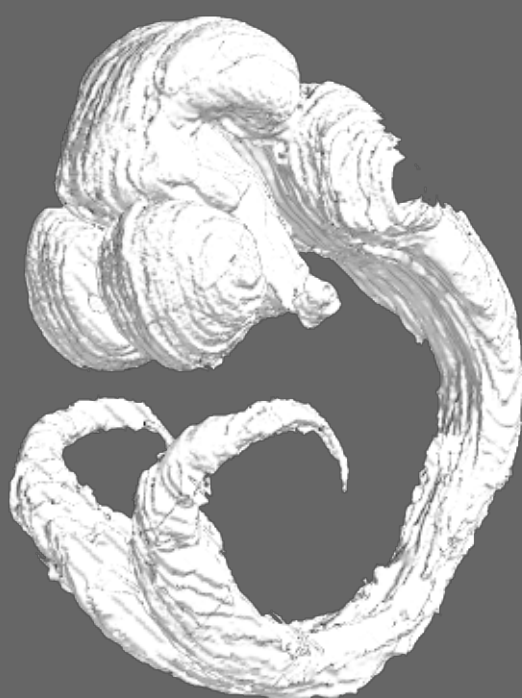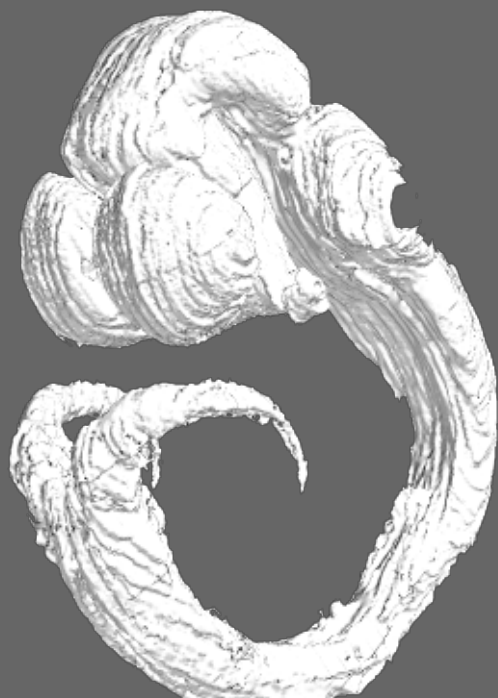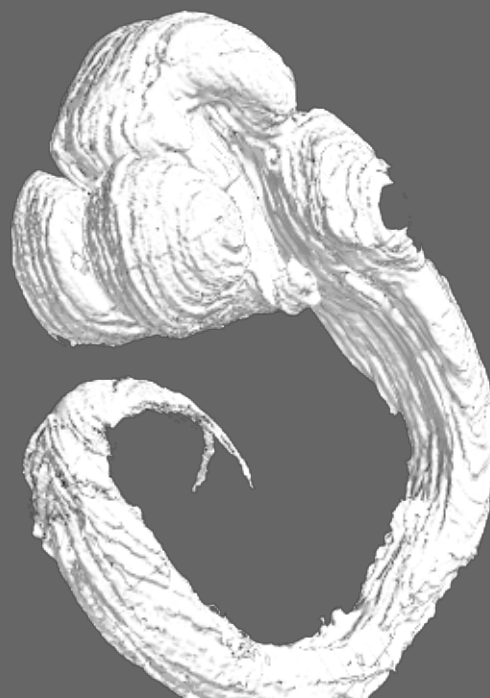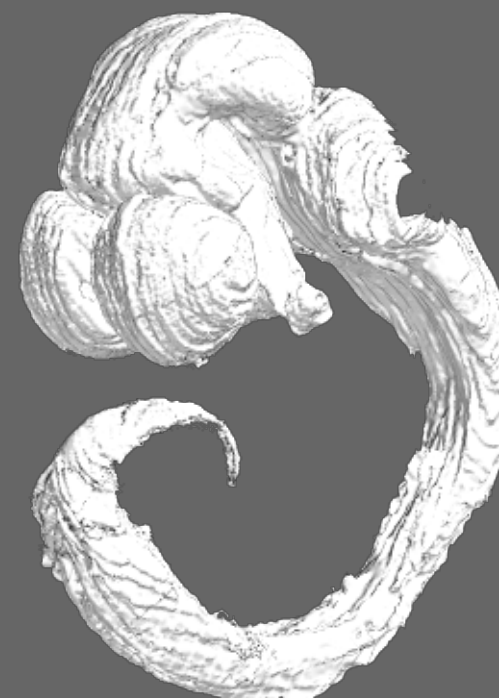

Supplement: supp [file elife-61408-supp-v1.zip]

**A** **Wnt3a in the Cortical Hem**

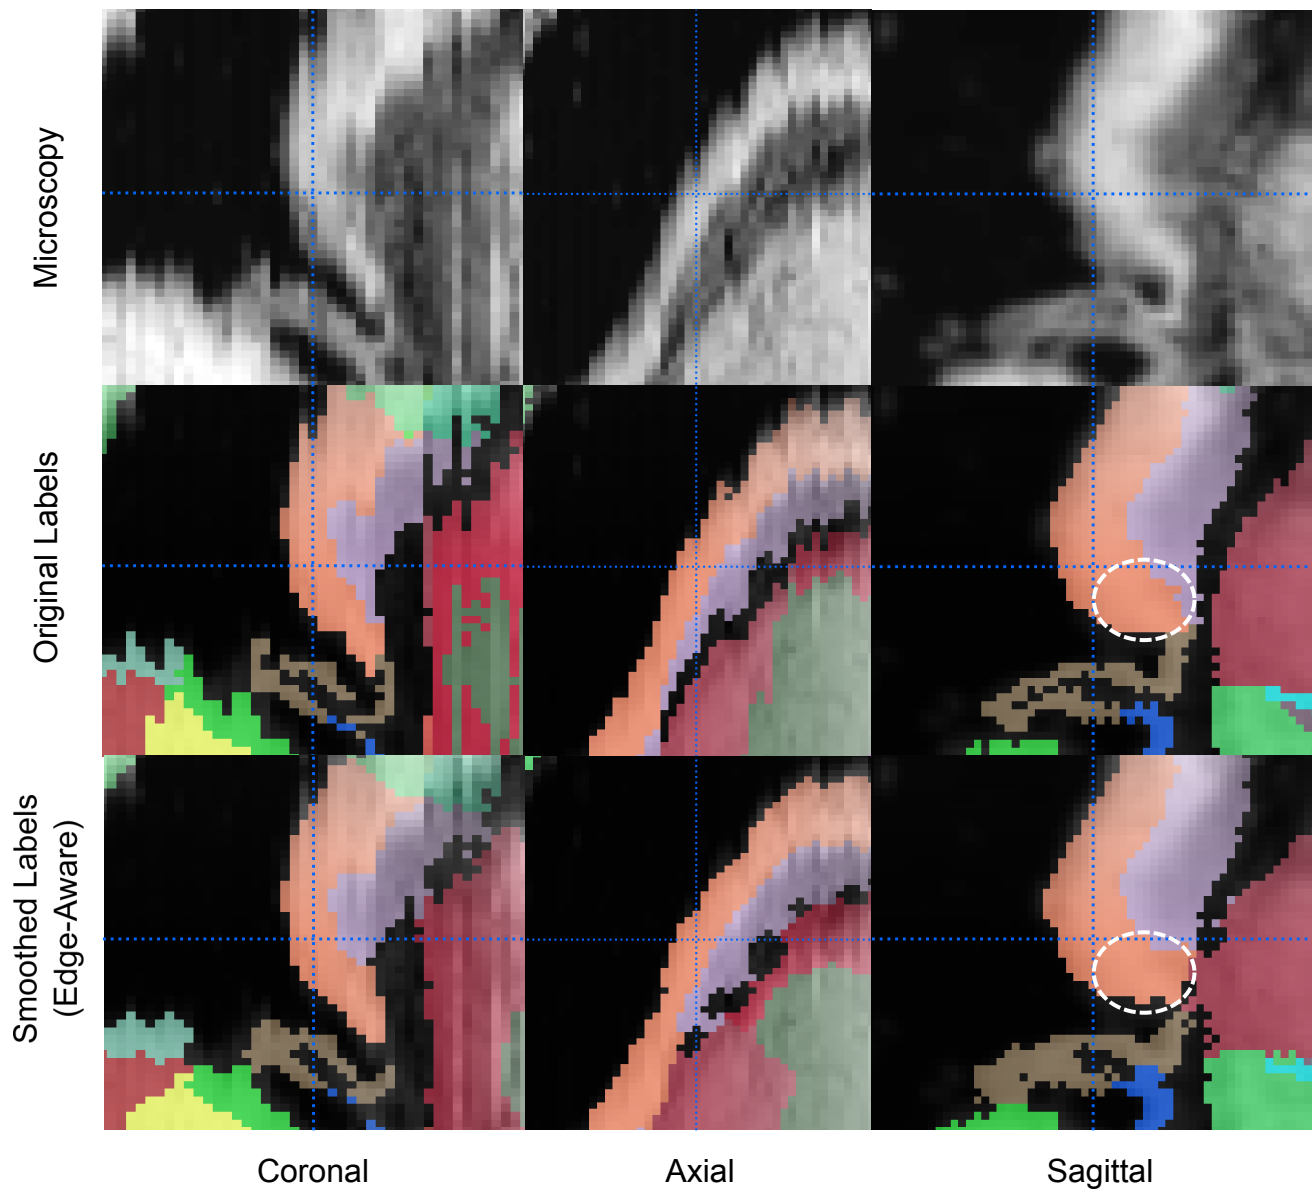

**B** **Hoxa2 in the Pontine Hindbrain**

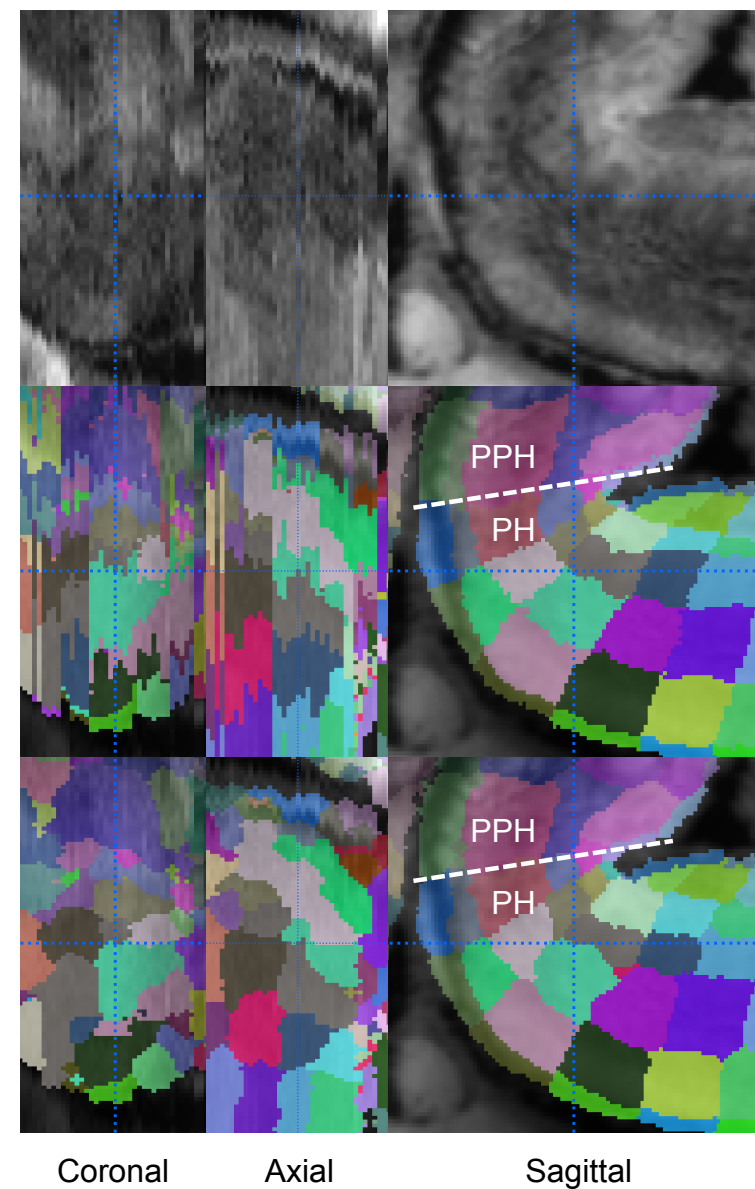

Supplement: supp [file elife-61408-supp-v1.zip]

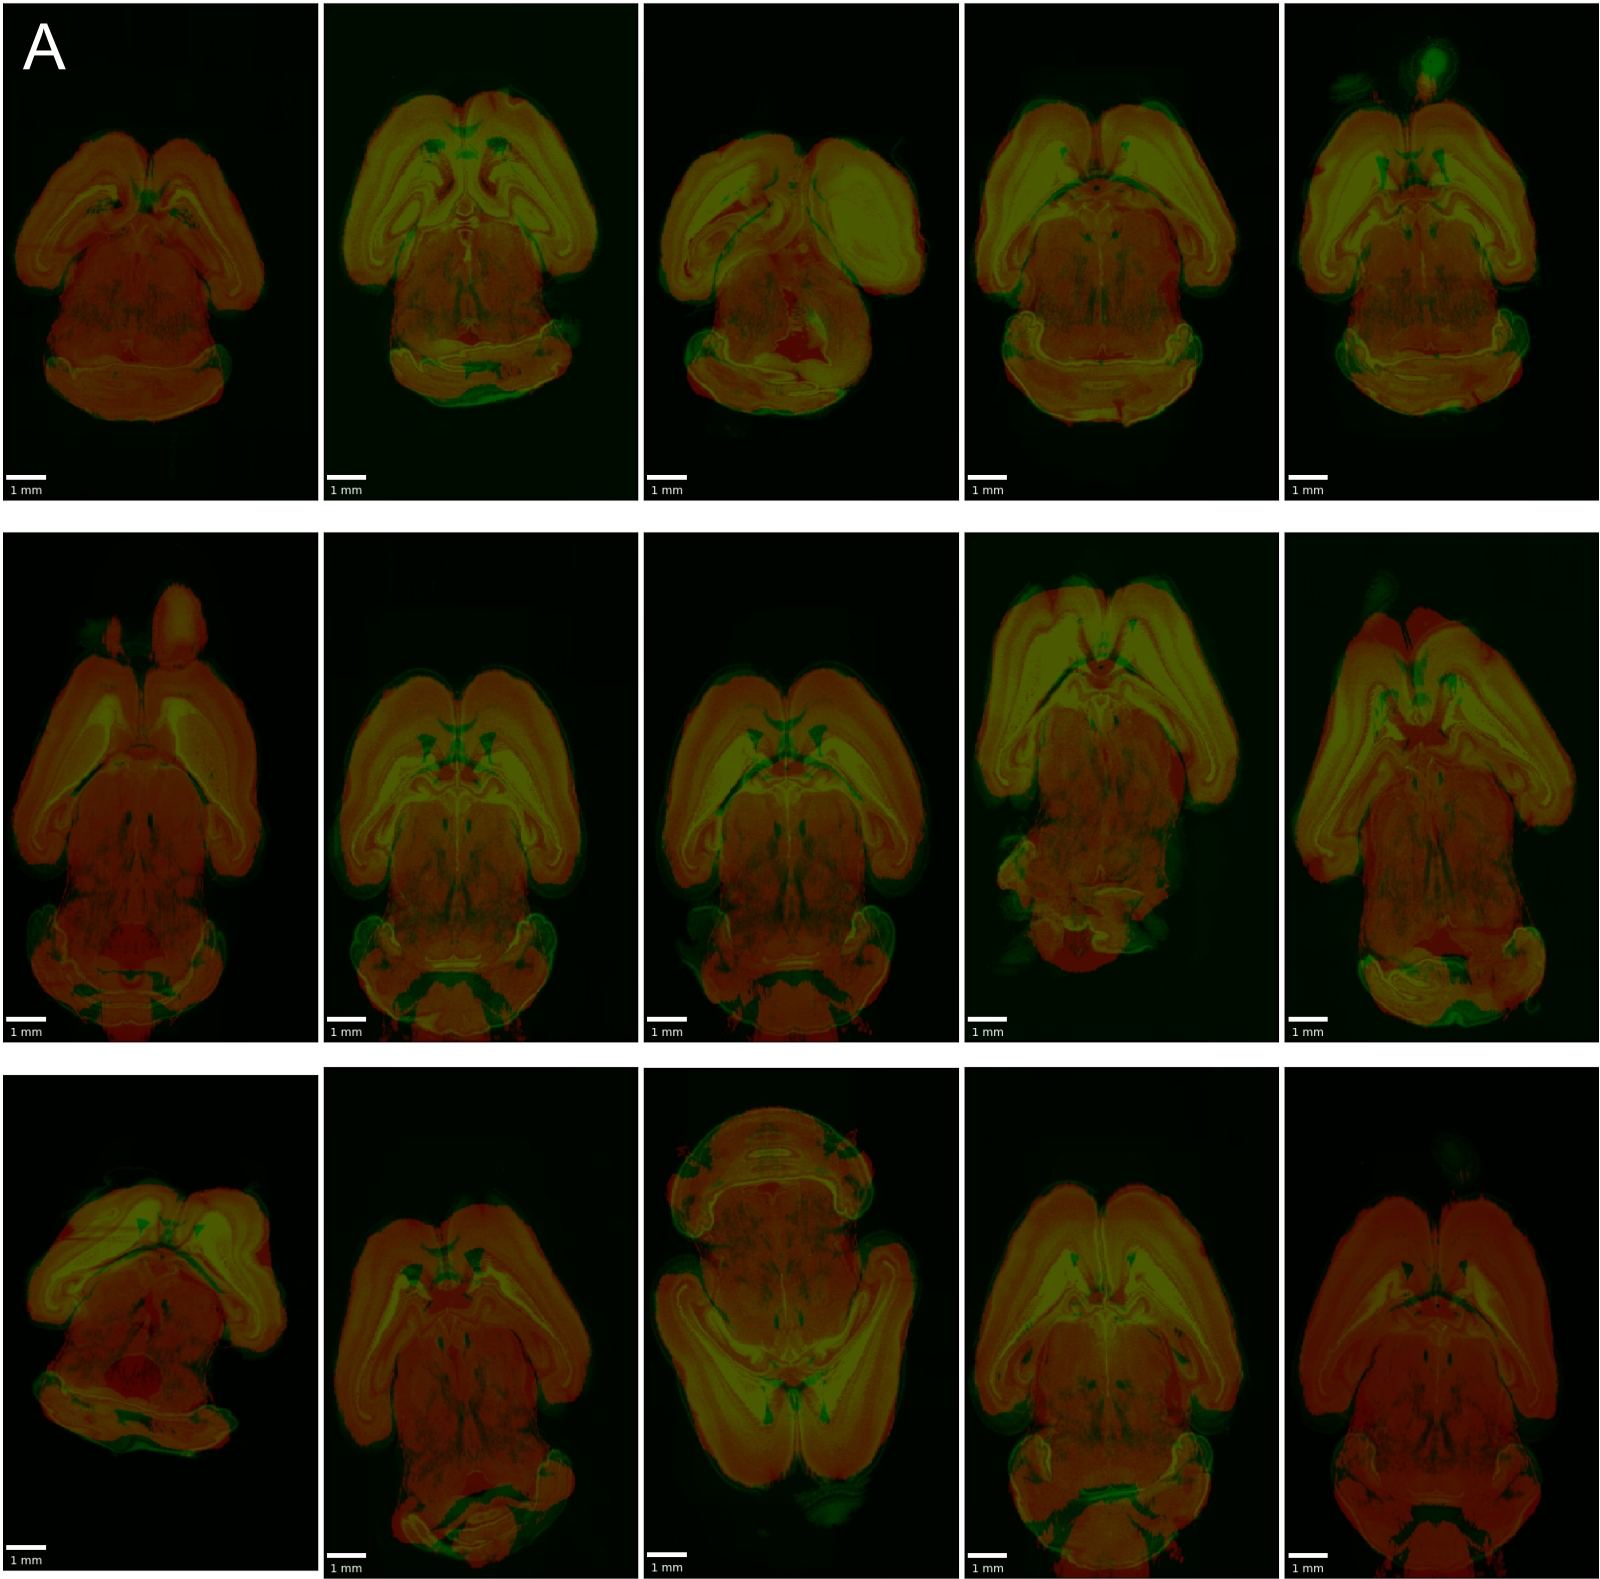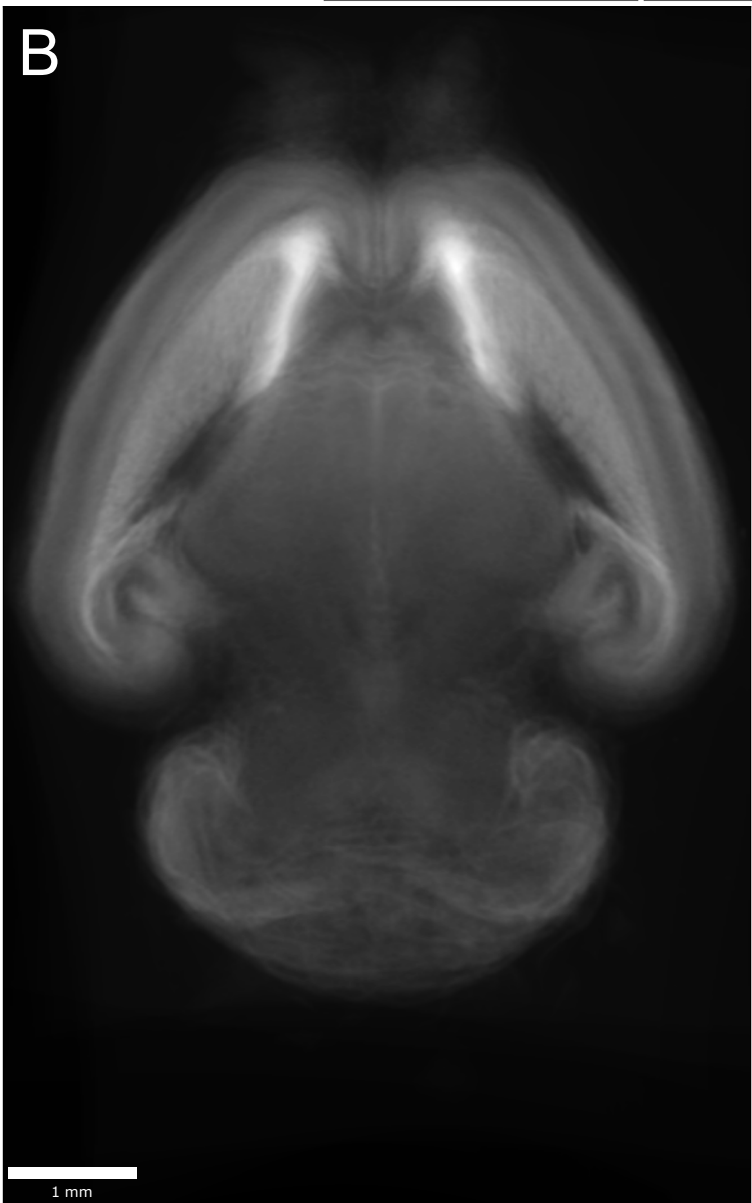

**C**

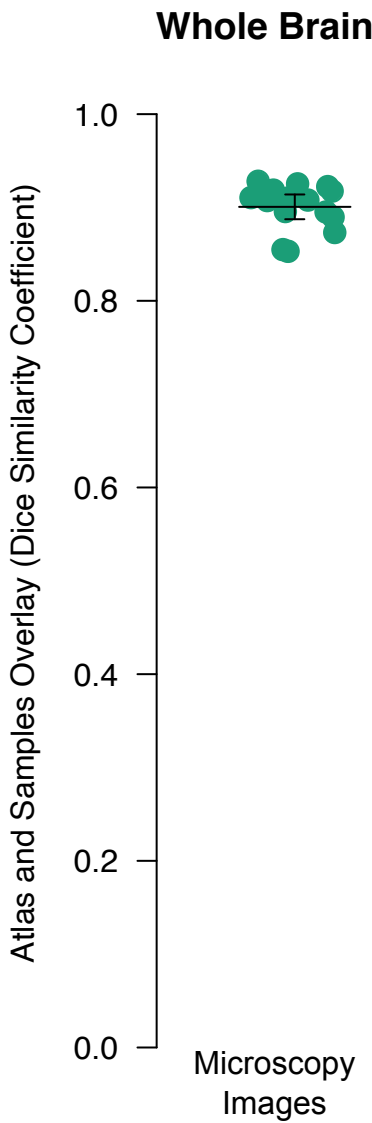

Supplement: supp [file elife-61408-supp-v1.zip]

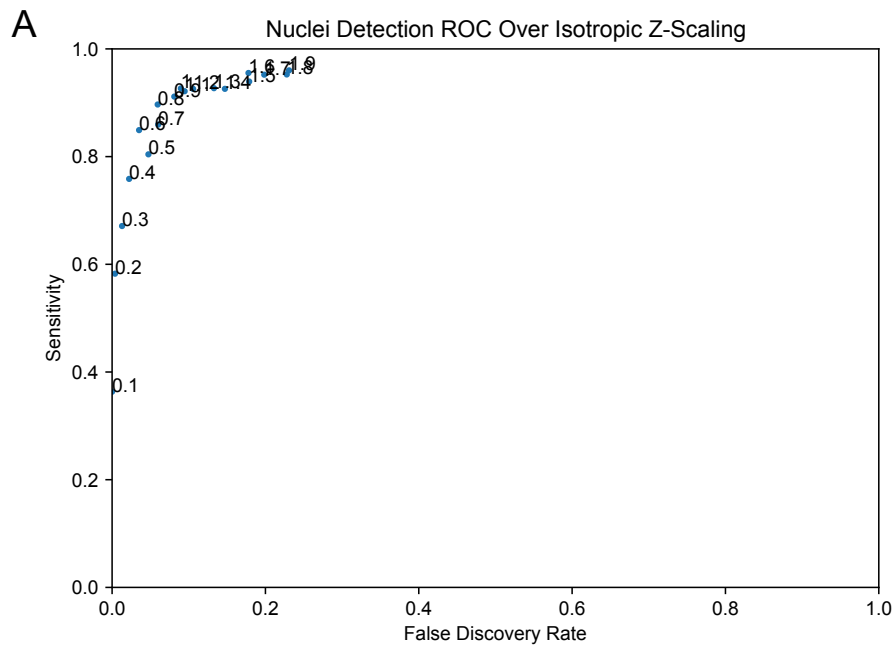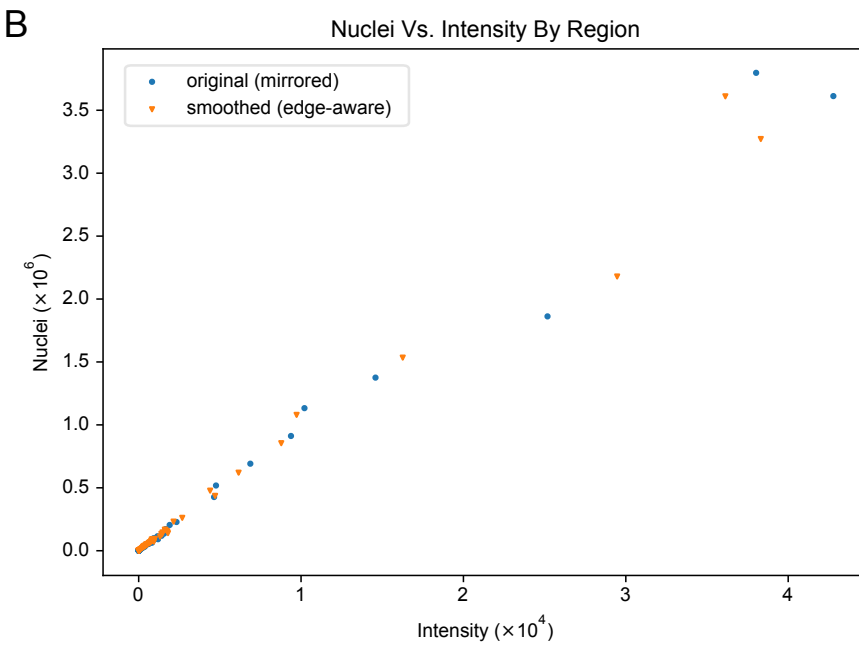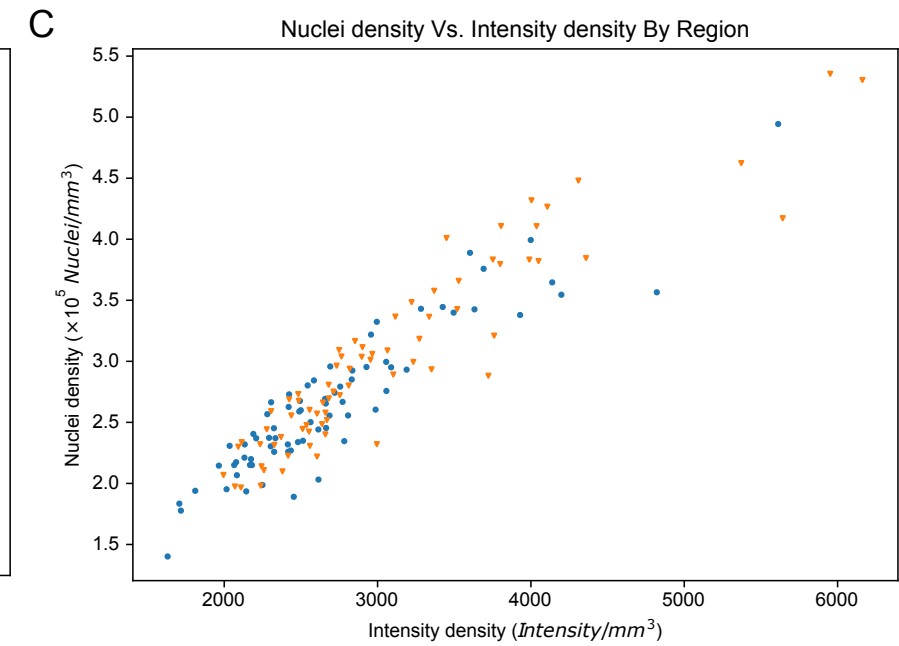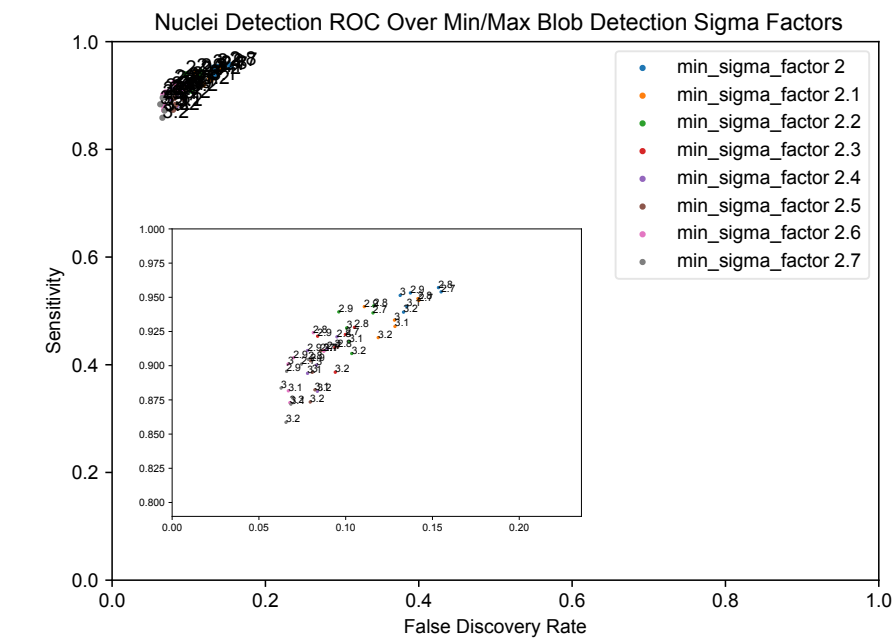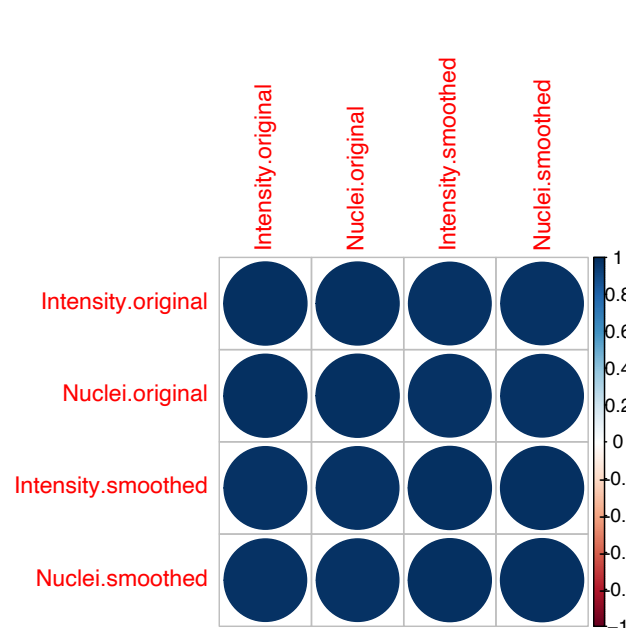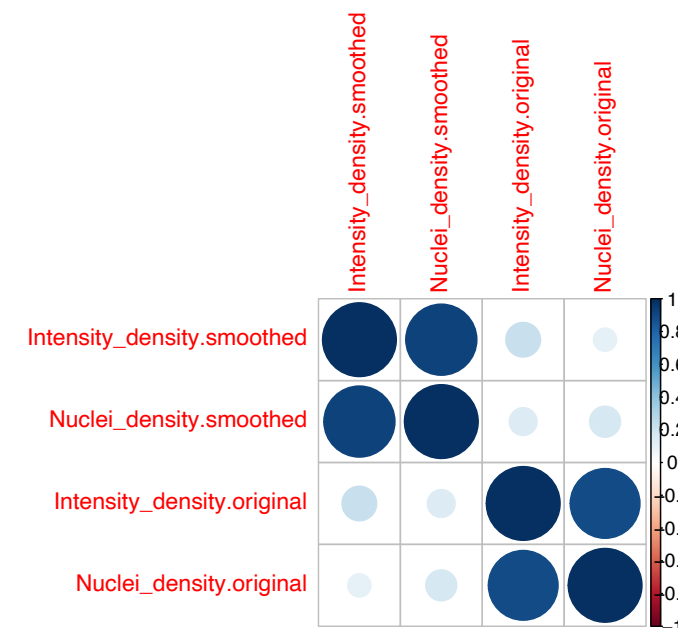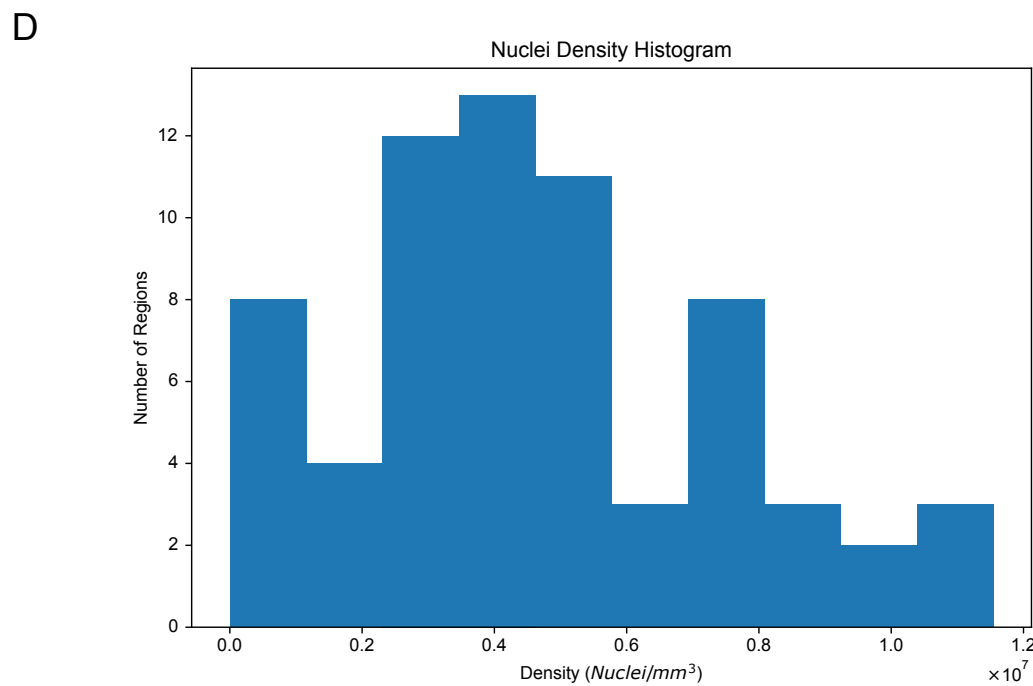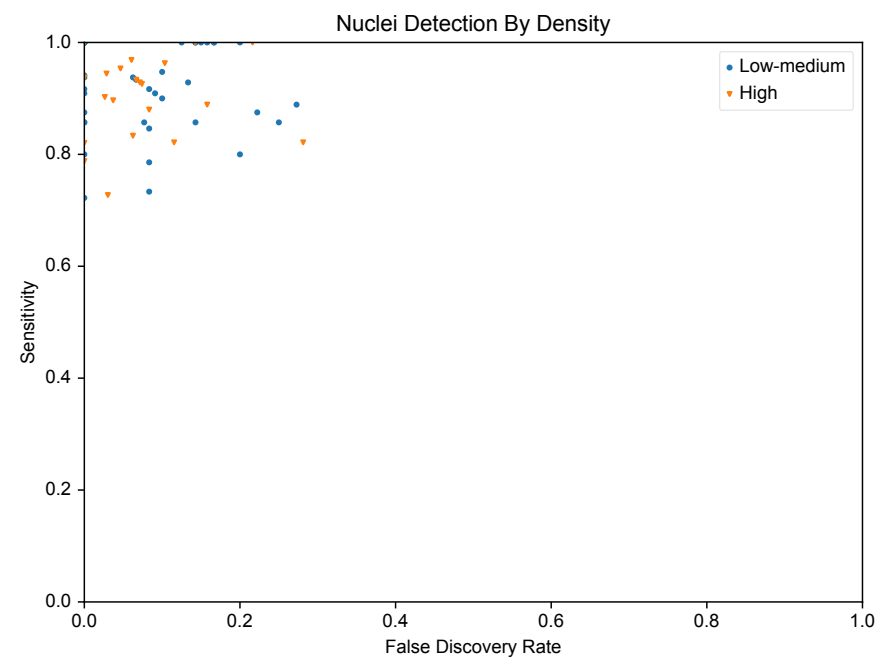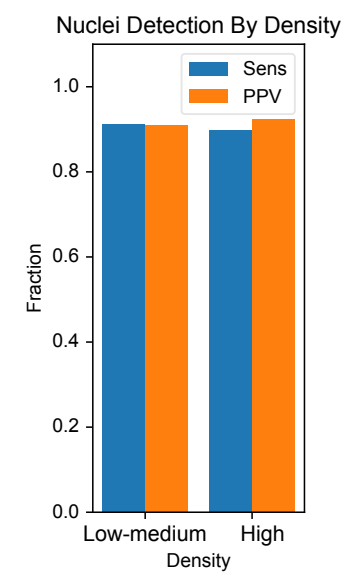

Supplement: supp [file elife-61408-supp-v1.zip]

A

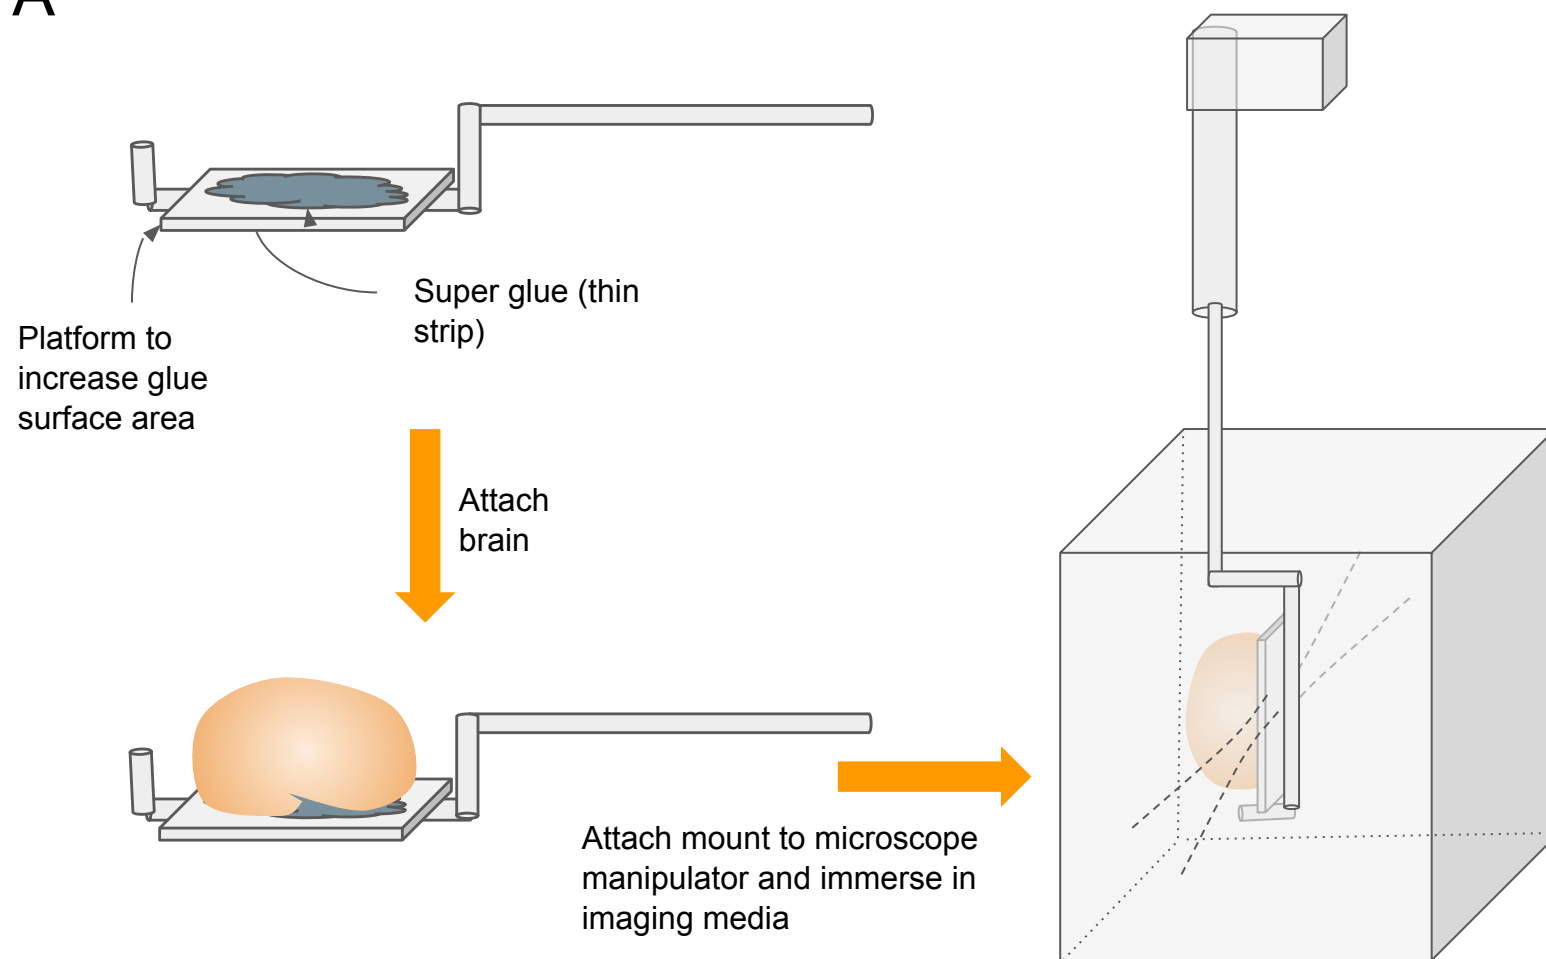

B

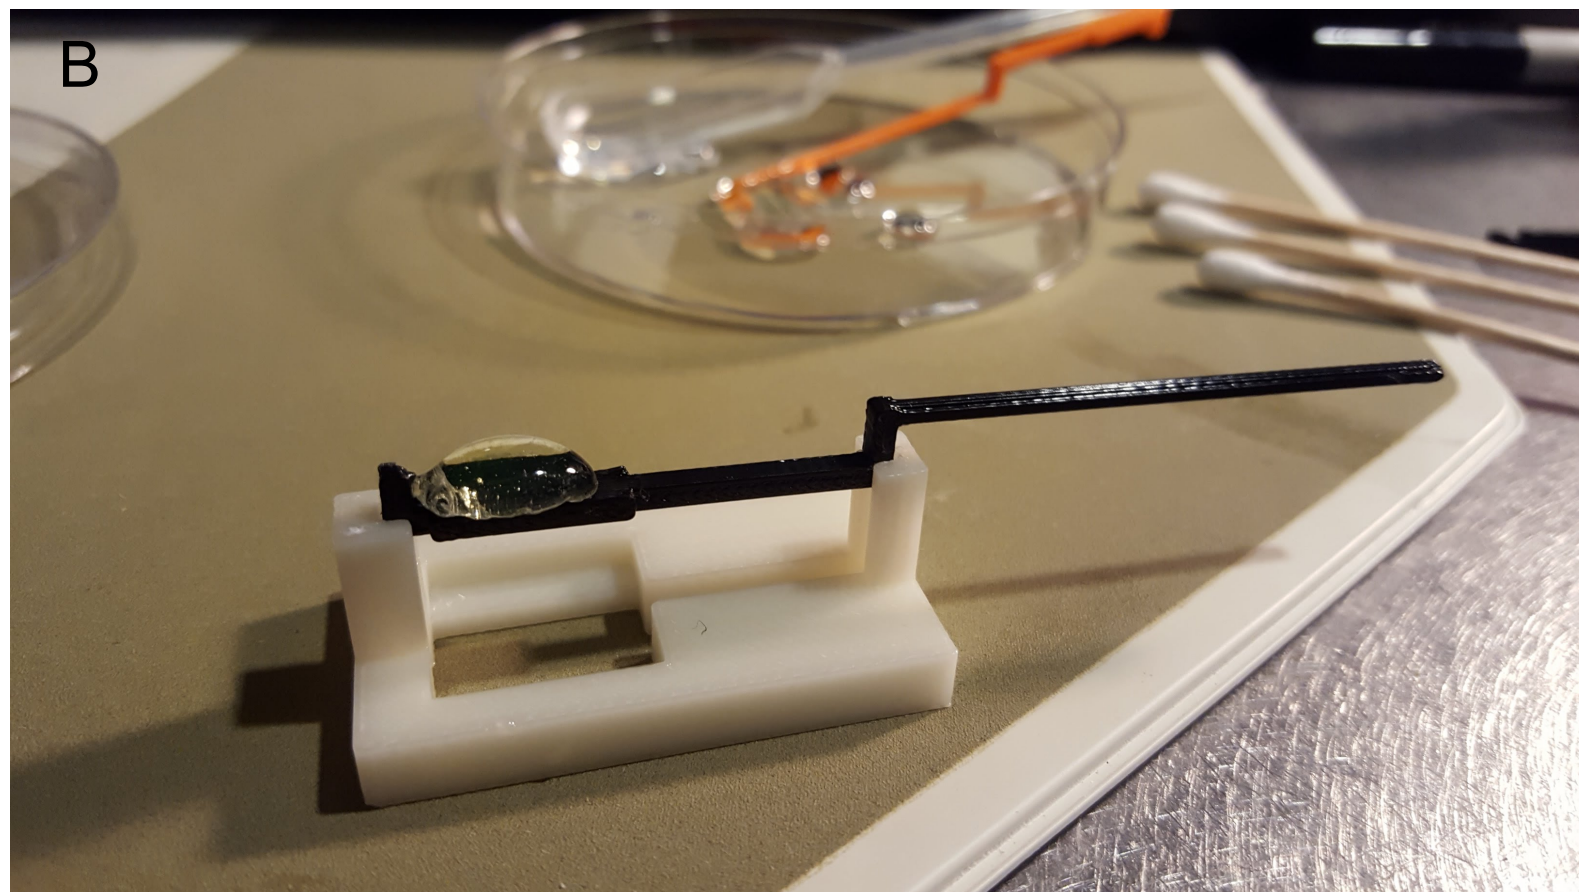

C

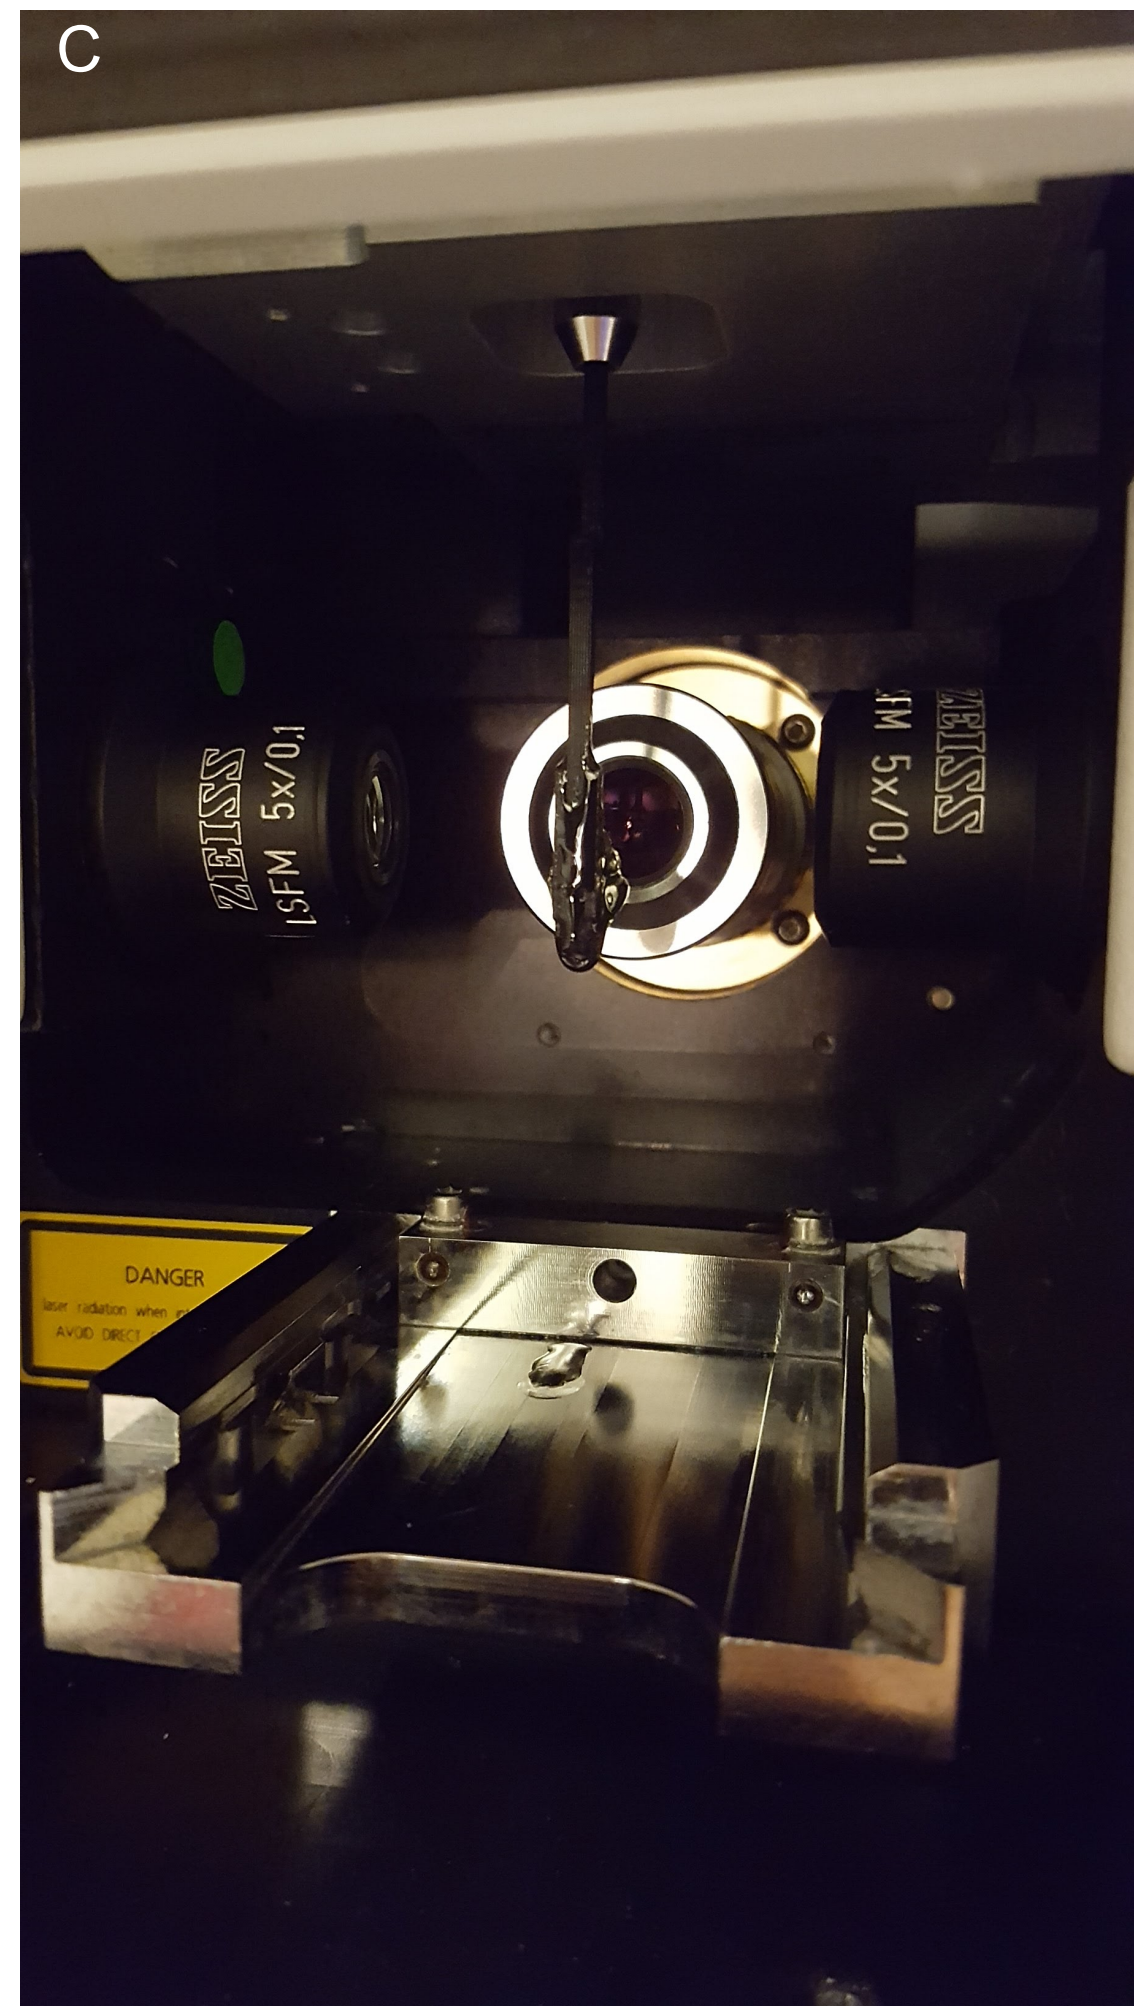

Supplement: supp [file elife-61408-supp-v1.zip]

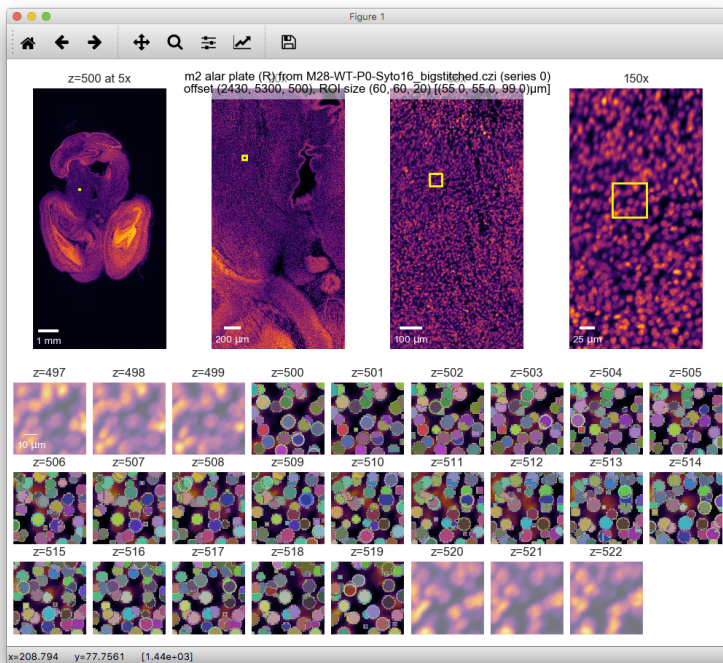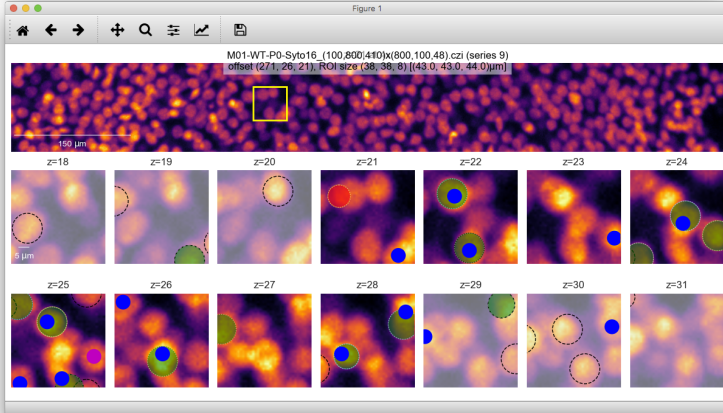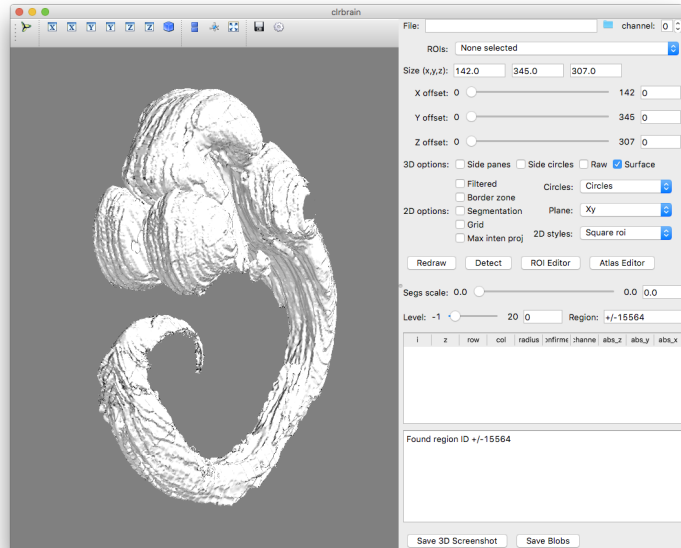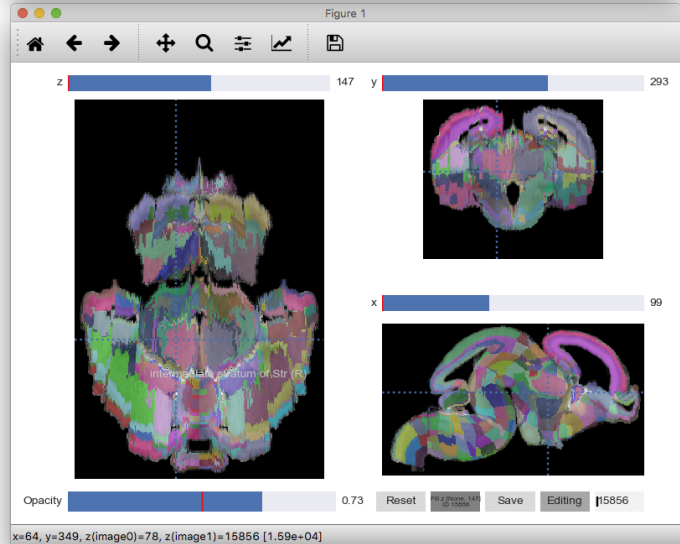

Supplement: supp [file elife-61408-supp-v1.zip]
